# Supplementary material for: Synthesis, characterization and crystal structures of novel fluorinated di(thiazolyl)benzene derivatives
Source: Royal Society of Chemistry journal article supplement (doi:10.1039/c9qo00044e), 2019-01-01
Supplement: c9qo00044e1.pdf [file c9qo00044e1.pdf]

## Electronic Support Information

# Synthesis, Characterization and Crystal Structures of Novel Fluorinated Di(thiazolyl)benzene Derivatives

Maciej Barłóg,<sup>a</sup> Ihor Kulai,<sup>a</sup> Xiaozhou Ji,<sup>b</sup> Nattamai Bhuvanesh,<sup>b</sup> Somnath Dey,<sup>a</sup> Eric Pierre Sliwinski,<sup>a</sup> Hassan Said Bazzi,<sup>a</sup> Lei Fang<sup>b</sup> and Mohammed Al-Hashimi<sup>\*a</sup>

### Table of contents

|                                                                                                                                                                                   |    |
|-----------------------------------------------------------------------------------------------------------------------------------------------------------------------------------|----|
| <b>Figure S1.</b> <sup>1</sup> H NMR spectrum of 1,4-di(thien-2-yl)-2-fluorobenzene <b>3a</b> (CDCl <sub>3</sub> , 400 MHz, 298 K).                                               | 3  |
| <b>Figure S2.</b> <sup>13</sup> C{ <sup>1</sup> H} NMR spectrum of 1,4-di(thien-2-yl)-2-fluorobenzene <b>3a</b> (CDCl <sub>3</sub> , 150 MHz, 298 K).                             | 3  |
| <b>Figure S3.</b> <sup>19</sup> F{ <sup>1</sup> H} NMR spectrum of 1,4-di(thien-2-yl)-2-fluorobenzene <b>3a</b> (CDCl <sub>3</sub> , 564 MHz, 298 K).                             | 4  |
| <b>Figure S4.</b> <sup>1</sup> H NMR spectrum of 1,4-di(thien-2-yl)-2,5-difluorobenzene <b>3b</b> (CDCl <sub>3</sub> , 400 MHz, 298 K).                                           | 4  |
| <b>Figure S5.</b> <sup>13</sup> C{ <sup>1</sup> H} NMR spectrum of 1,4-di(thien-2-yl)-2,5-difluorobenzene <b>3b</b> (CDCl <sub>3</sub> , 150 MHz, 298 K).                         | 5  |
| <b>Figure S6.</b> <sup>19</sup> F{ <sup>1</sup> H} NMR spectrum of 1,4-di(thien-2-yl)-2,5-difluorobenzene <b>3b</b> (CDCl <sub>3</sub> , 376 MHz, 298 K).                         | 5  |
| <b>Figure S7.</b> <sup>1</sup> H NMR spectrum of 1,4-di(thien-2-yl)-tetrafluorobenzene <b>3c</b> (CDCl <sub>3</sub> , 400 MHz, 298 K).                                            | 6  |
| <b>Figure S8.</b> <sup>13</sup> C{ <sup>1</sup> H} NMR spectrum of 1,4-di(thien-2-yl)-tetrafluorobenzene <b>3c</b> (CDCl <sub>3</sub> , 100 MHz, 298 K).                          | 6  |
| <b>Figure S9.</b> <sup>19</sup> F{ <sup>1</sup> H} NMR spectrum of 1,4-di(thien-2-yl)-tetrafluorobenzene <b>3c</b> (CDCl <sub>3</sub> , 376 MHz, 298 K).                          | 7  |
| <b>Figure S10.</b> <sup>1</sup> H NMR spectrum of 1,4-di(thiazol-2-yl)-2-fluorobenzene <b>4a</b> (CDCl <sub>3</sub> , 600 MHz, 298 K).                                            | 7  |
| <b>Figure S11.</b> <sup>13</sup> C{ <sup>1</sup> H} NMR spectrum of 1,4-di(thiazol-2-yl)-2-fluorobenzene <b>4a</b> (CDCl <sub>3</sub> , 150 MHz, 298 K).                          | 8  |
| <b>Figure S12.</b> <sup>19</sup> F{ <sup>1</sup> H} NMR spectrum of 1,4-di(thiazol-2-yl)-2-fluorobenzene <b>4a</b> (CDCl <sub>3</sub> , 564 MHz, 298 K).                          | 8  |
| <b>Figure S13.</b> <sup>1</sup> H NMR spectrum of 1,4-di(thiazol-2-yl)-2,5-difluorobenzene <b>4b</b> (CDCl <sub>3</sub> , 400 MHz, 323 K).                                        | 9  |
| <b>Figure S14.</b> <sup>13</sup> C{ <sup>1</sup> H} NMR spectrum of 1,4-di(thiazol-2-yl)-2,5-difluorobenzene <b>4b</b> (CDCl <sub>3</sub> , 100 MHz, 323 K).                      | 9  |
| <b>Figure S15.</b> <sup>19</sup> F{ <sup>1</sup> H} NMR spectrum of 1,4-di(thiazol-2-yl)-2,5-difluorobenzene <b>4b</b> (CDCl <sub>3</sub> , 564 MHz, 298 K).                      | 10 |
| <b>Figure S16.</b> <sup>1</sup> H NMR spectrum of 1,4-di(thiazol-2-yl)-tetrafluorobenzene <b>4c</b> (CDCl <sub>3</sub> , 600 MHz, 298 K).                                         | 10 |
| <b>Figure S17.</b> <sup>13</sup> C{ <sup>1</sup> H} NMR spectrum of 1,4-di(thiazol-2-yl)-tetrafluorobenzene <b>4c</b> (CDCl <sub>3</sub> , 150 MHz, 298 K).                       | 11 |
| <b>Figure S18.</b> <sup>19</sup> F{ <sup>1</sup> H} NMR spectrum of 1,4-di(thiazol-2-yl)-tetrafluorobenzene <b>4c</b> (CDCl <sub>3</sub> , 564 MHz, 298 K).                       | 11 |
| <b>Figure S19.</b> <sup>1</sup> H NMR spectrum of 1,4-di(2-(triisopropylsilyl)thiazol-5-yl)benzene <b>5a</b> (CDCl <sub>3</sub> , 400 MHz, 298 K).                                | 12 |
| <b>Figure S20.</b> <sup>13</sup> C{ <sup>1</sup> H} NMR spectrum of 1,4-di(2-(triisopropylsilyl)thiazol-5-yl)benzene <b>5a</b> (CDCl <sub>3</sub> , 100 MHz, 298 K).              | 12 |
| <b>Figure S21.</b> <sup>1</sup> H NMR spectrum of 1,4-di(2-(triisopropylsilyl)thiazol-5-yl)-2-fluorobenzene <b>5b</b> (CDCl <sub>3</sub> , 400 MHz, 298 K).                       | 13 |
| <b>Figure S22.</b> <sup>13</sup> C{ <sup>1</sup> H} NMR spectrum of 1,4-di(2-(triisopropylsilyl)thiazol-5-yl)-2-fluorobenzene <b>5b</b> (CDCl <sub>3</sub> , 150 MHz, 298 K).     | 13 |
| <b>Figure S23.</b> <sup>19</sup> F{ <sup>1</sup> H} NMR spectrum of 1,4-di(2-(triisopropylsilyl)thiazol-5-yl)-2-fluorobenzene <b>5b</b> (CDCl <sub>3</sub> , 376 MHz, 298 K).     | 14 |
| <b>Figure S24.</b> <sup>1</sup> H NMR spectrum of 1,4-di(2-(triisopropylsilyl)thiazol-5-yl)-2,5-difluorobenzene <b>5c</b> (CDCl <sub>3</sub> , 400 MHz, 298 K).                   | 14 |
| <b>Figure S25.</b> <sup>13</sup> C{ <sup>1</sup> H} NMR spectrum of 1,4-di(2-(triisopropylsilyl)thiazol-5-yl)-2,5-difluorobenzene <b>5c</b> (CDCl <sub>3</sub> , 150 MHz, 298 K). | 15 |
| <b>Figure S26.</b> <sup>19</sup> F{ <sup>1</sup> H} NMR spectrum of 1,4-di(2-(triisopropylsilyl)thiazol-5-yl)-2,5-difluorobenzene <b>5c</b> (CDCl <sub>3</sub> , 376 MHz, 298 K). | 15 |
| <b>Figure S27.</b> <sup>1</sup> H NMR spectrum of 1,4-di(2-(triisopropylsilyl)thiazol-5-yl)-tetrafluorobenzene <b>5d</b> (CDCl <sub>3</sub> , 600 MHz, 298 K).                    | 16 |
| <b>Figure S28.</b> <sup>13</sup> C{ <sup>1</sup> H} NMR spectrum of 1,4-di(2-(triisopropylsilyl)thiazol-5-yl)-tetrafluorobenzene <b>5d</b> (CDCl <sub>3</sub> , 150 MHz, 298 K).  | 16 |
| <b>Figure S29.</b> <sup>19</sup> F{ <sup>1</sup> H} NMR spectrum of 1,4-di(2-(triisopropylsilyl)thiazol-5-yl)-tetrafluorobenzene <b>5d</b> (CDCl <sub>3</sub> , 564 MHz, 298 K).  | 17 |
| <b>Figure S30.</b> <sup>1</sup> H NMR spectrum of 1,4-di(thiazol-5-yl)-benzene <b>6a</b> (CDCl <sub>3</sub> , 400 MHz, 298 K).                                                    | 17 |
| <b>Figure S31.</b> <sup>13</sup> C{ <sup>1</sup> H} NMR spectrum of 1,4-di(thiazol-5-yl)-benzene <b>6a</b> (CDCl <sub>3</sub> , 150 MHz, 298 K).                                  | 18 |
| <b>Figure S32.</b> <sup>1</sup> H NMR spectrum of 1,4-di(thiazol-5-yl)-2-fluorobenzene <b>6b</b> (CDCl <sub>3</sub> , 400 MHz, 298 K).                                            | 18 |
| <b>Figure S33.</b> <sup>13</sup> C{ <sup>1</sup> H} NMR spectrum of 1,4-di(thiazol-5-yl)-2-fluorobenzene <b>6b</b> (CDCl <sub>3</sub> , 150 MHz, 298 K).                          | 19 |
| <b>Figure S34.</b> <sup>19</sup> F{ <sup>1</sup> H} NMR spectrum of 1,4-di(thiazol-5-yl)-2-fluorobenzene <b>6b</b> (CDCl <sub>3</sub> , 376 MHz, 298 K).                          | 19 |
| <b>Figure S35.</b> <sup>1</sup> H NMR spectrum of 1,4-di(thiazol-5-yl)-2,5-difluorobenzene <b>6c</b> (CDCl <sub>3</sub> , 600 MHz, 298 K).                                        | 20 |

|                                                                                                                                                                                                                     |    |
|---------------------------------------------------------------------------------------------------------------------------------------------------------------------------------------------------------------------|----|
| <b>Figure S36.</b> $^{13}\text{C}\{^1\text{H}\}$ NMR spectrum of 1,4-di(thiazol-5-yl)-2,5-difluorobenzene <b>6c</b> ( $\text{CDCl}_3$ , 150 MHz, 298 K) .....                                                       | 20 |
| <b>Figure S37.</b> $^{19}\text{F}\{^1\text{H}\}$ NMR spectrum of 1,4-di(thiazol-5-yl)-2,5-difluorobenzene <b>6c</b> ( $\text{CDCl}_3$ , 564 MHz, 298 K).....                                                        | 21 |
| <b>Figure S38.</b> $^1\text{H}$ NMR spectrum of 1,4-di(thiazol-5-yl)-tetrafluorobenzene <b>6d</b> ( $\text{CDCl}_3$ , 600 MHz, 298 K).....                                                                          | 21 |
| <b>Figure S39.</b> $^{13}\text{C}\{^1\text{H}\}$ NMR spectrum of 1,4-di(thiazol-5-yl)-tetrafluorobenzene <b>6d</b> ( $\text{CDCl}_3$ , 150 MHz, 298 K).....                                                         | 22 |
| <b>Figure S40.</b> $^{19}\text{F}\{^1\text{H}\}$ NMR spectrum of 1,4-di(thiazol-5-yl)-tetrafluorobenzene <b>6d</b> ( $\text{CDCl}_3$ , 564 MHz, 298 K) .....                                                        | 22 |
| <b>Table S1.</b> Key crystallographic data .....                                                                                                                                                                    | 23 |
| <b>Figure S41.</b> Crystal structures of 1,4-di(thien-2-yl)benzenes <b>3b,c</b> .....                                                                                                                               | 24 |
| <b>Figure S42.</b> Crystal structures of 1,4-di(thiazol-2-yl)benzenes <b>4a-c</b> .....                                                                                                                             | 25 |
| <b>Figure S43.</b> Molecular structure of di(thiazol-5-yl)benzene <b>6a</b> . The thermal ellipsoids are scaled to the 50% probability level. Hydrogen atoms irrelevant to discussion are omitted for clarity. .... | 25 |
| <b>Figure S44.</b> Crystal structures of 1,4-di(thiazol-5-yl)benzenes <b>6a-d</b> .....                                                                                                                             | 26 |
| <b>Figure S45.</b> Molecular structure of 1,4-di(2-(triisopropylsilyl)thiazol-5-yl)benzene <b>5a</b> .....                                                                                                          | 26 |
| <b>Figure S46.</b> Crystal structures of 1,4-di(2-(triisopropylsilyl)thiazol-5-yl)benzenes <b>5a-d</b> . TIPS groups are dashed for clarity. ....                                                                   | 27 |
| <b>Figure S47.</b> Normalized DSC curves for compounds <b>3b,c</b> , <b>4a-c</b> , <b>5a-d</b> and <b>6a-d</b> .....                                                                                                | 28 |

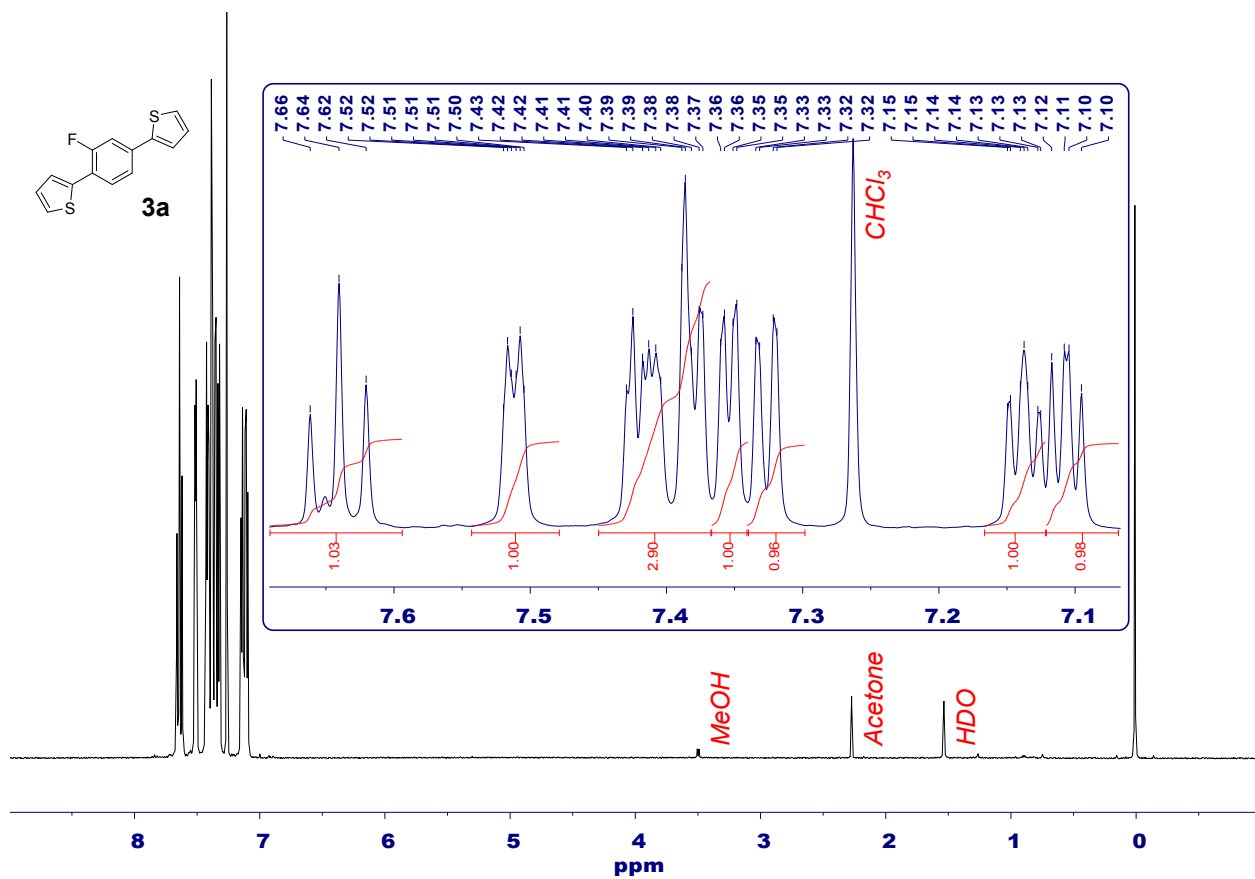

Figure S1. <sup>1</sup>H NMR spectrum of 1,4-di(thien-2-yl)-2-fluorobenzene **3a** (CDCl<sub>3</sub>, 400 MHz, 298 K).

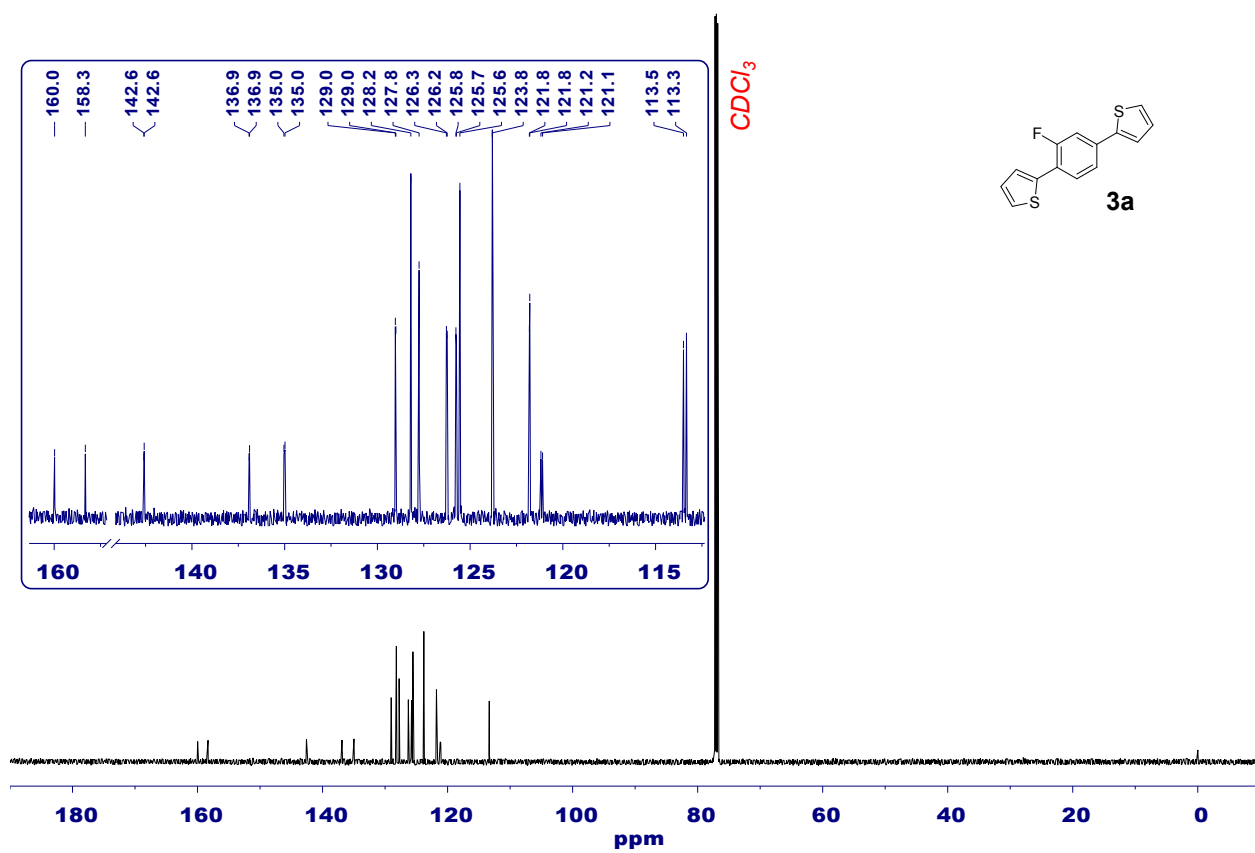

Figure S2. <sup>13</sup>C{<sup>1</sup>H} NMR spectrum of 1,4-di(thien-2-yl)-2-fluorobenzene **3a** (CDCl<sub>3</sub>, 150 MHz, 298 K).

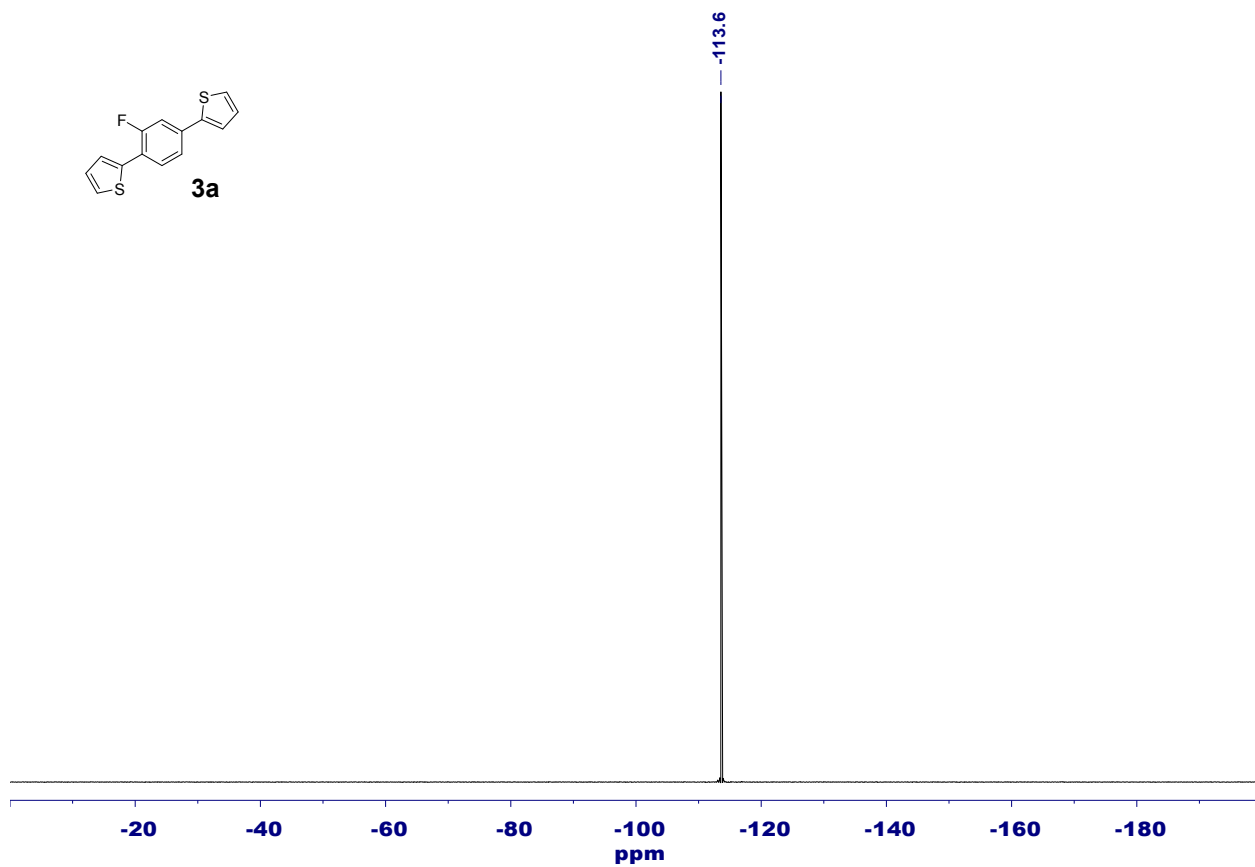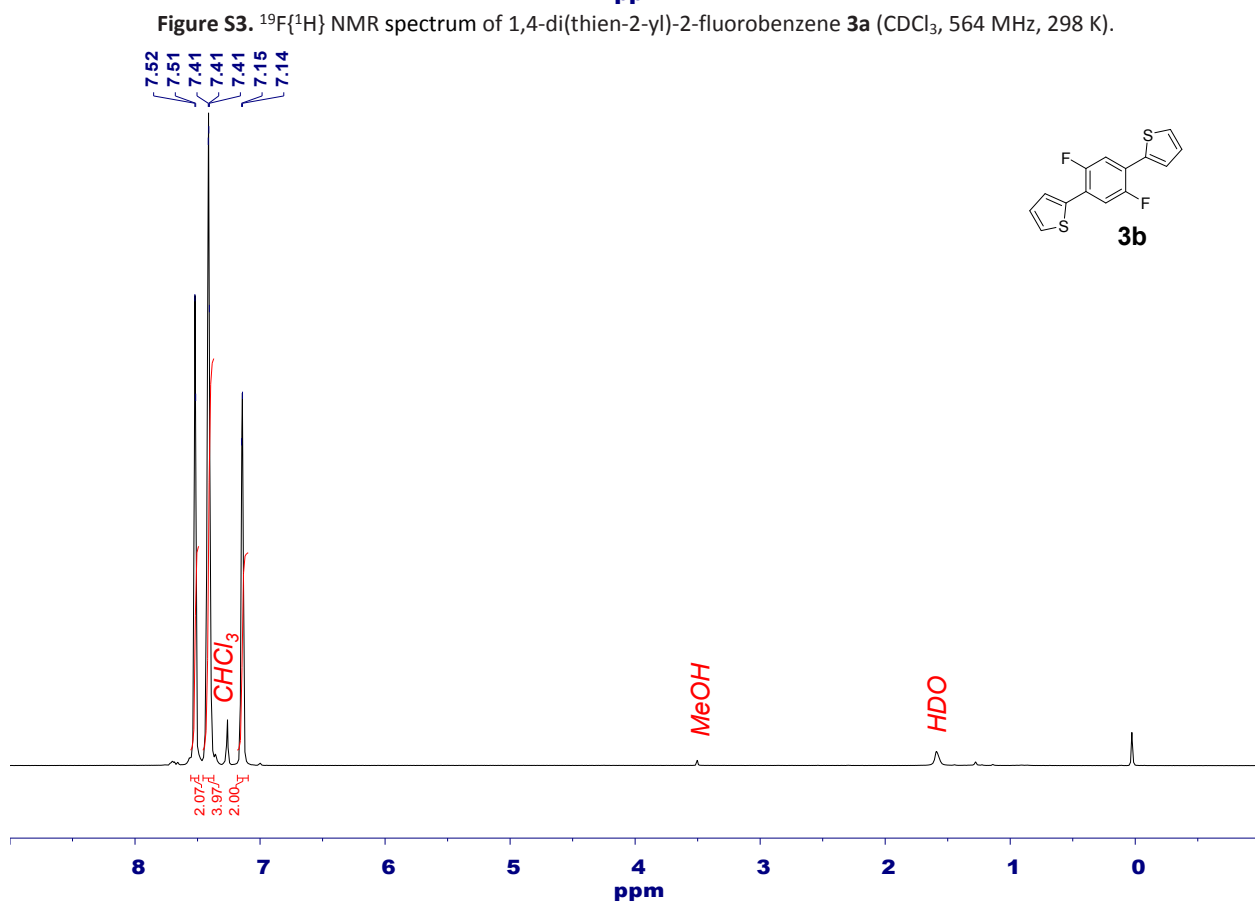

Figure S4.  $^1\text{H}$  NMR spectrum of 1,4-di(thien-2-yl)-2,5-difluorobenzene **3b** ( $\text{CDCl}_3$ , 400 MHz, 298 K).

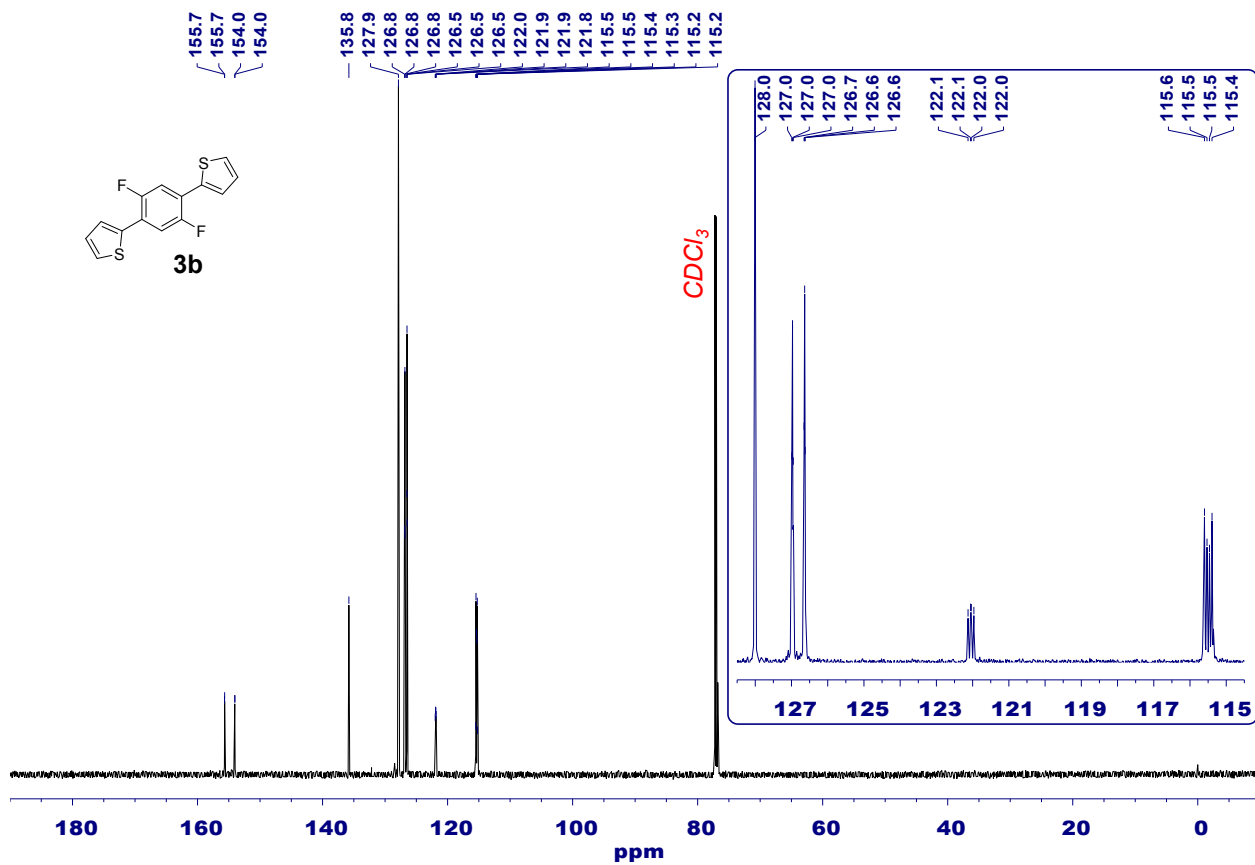

Figure S5.  $^{13}\text{C}\{^1\text{H}\}$  NMR spectrum of 1,4-di(thien-2-yl)-2,5-difluorobenzene **3b** ( $\text{CDCl}_3$ , 150 MHz, 298 K).

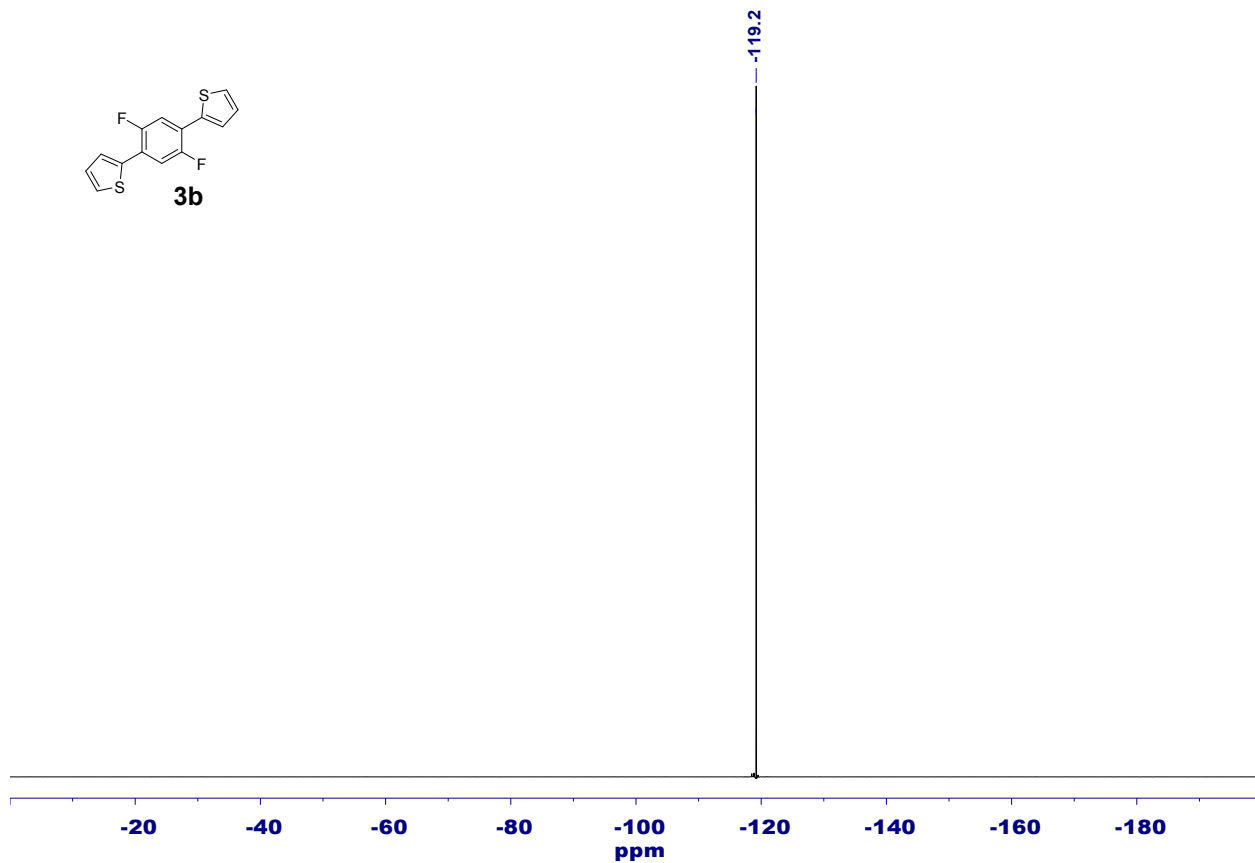

Figure S6.  $^{19}\text{F}\{^1\text{H}\}$  NMR spectrum of 1,4-di(thien-2-yl)-2,5-difluorobenzene **3b** ( $\text{CDCl}_3$ , 376 MHz, 298 K).

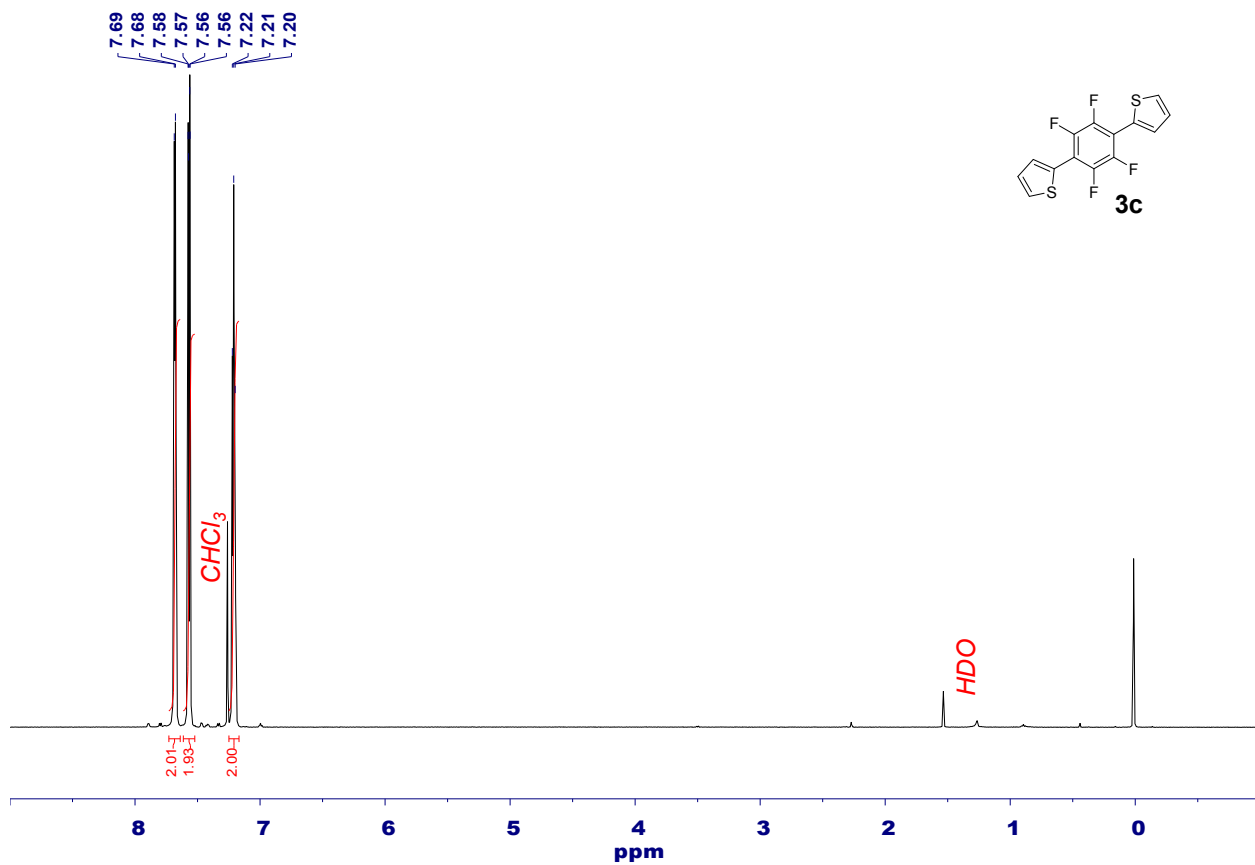

Figure S7. <sup>1</sup>H NMR spectrum of 1,4-di(thien-2-yl)-tetrafluorobenzene **3c** (CDCl<sub>3</sub>, 400 MHz, 298 K).

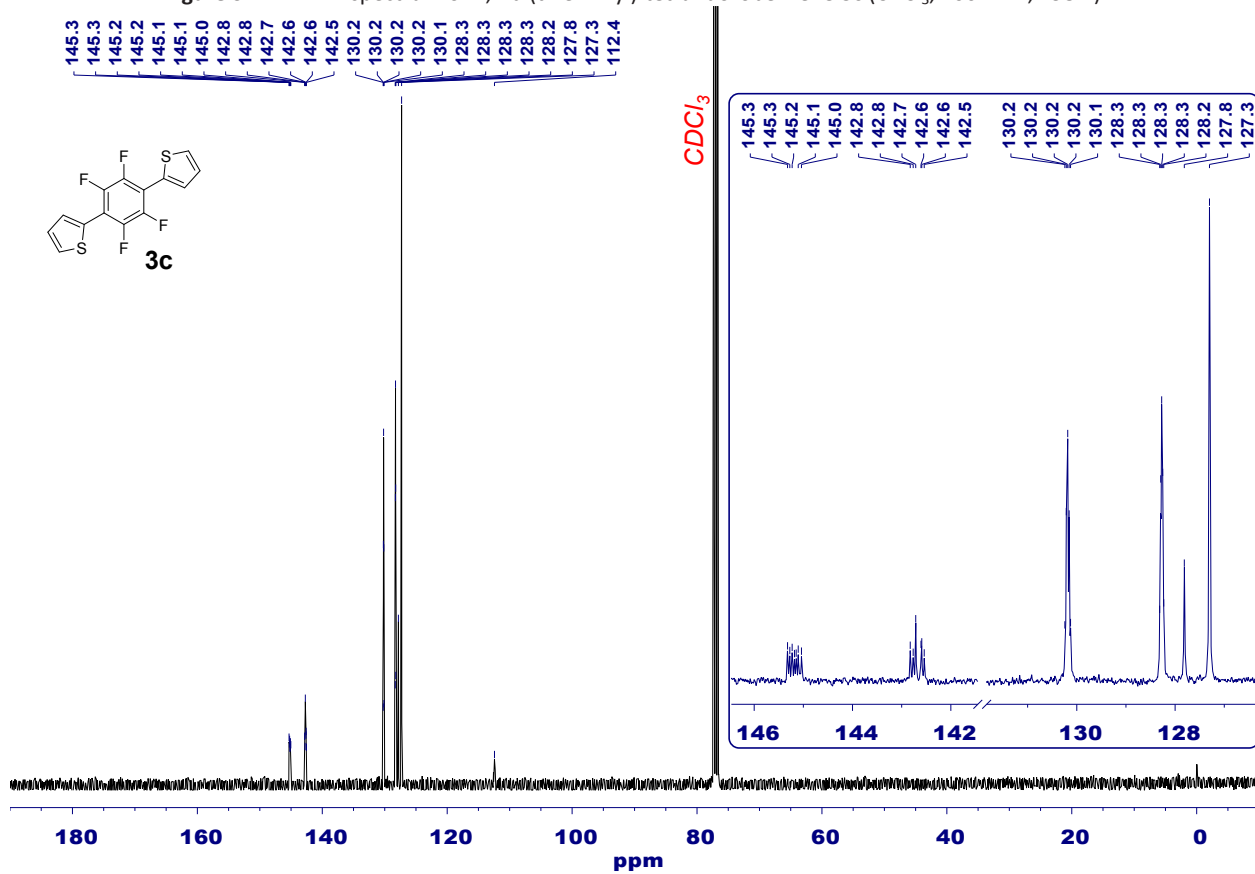

Figure S8. <sup>13</sup>C{<sup>1</sup>H} NMR spectrum of 1,4-di(thien-2-yl)-tetrafluorobenzene **3c** (CDCl<sub>3</sub>, 100 MHz, 298 K).

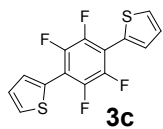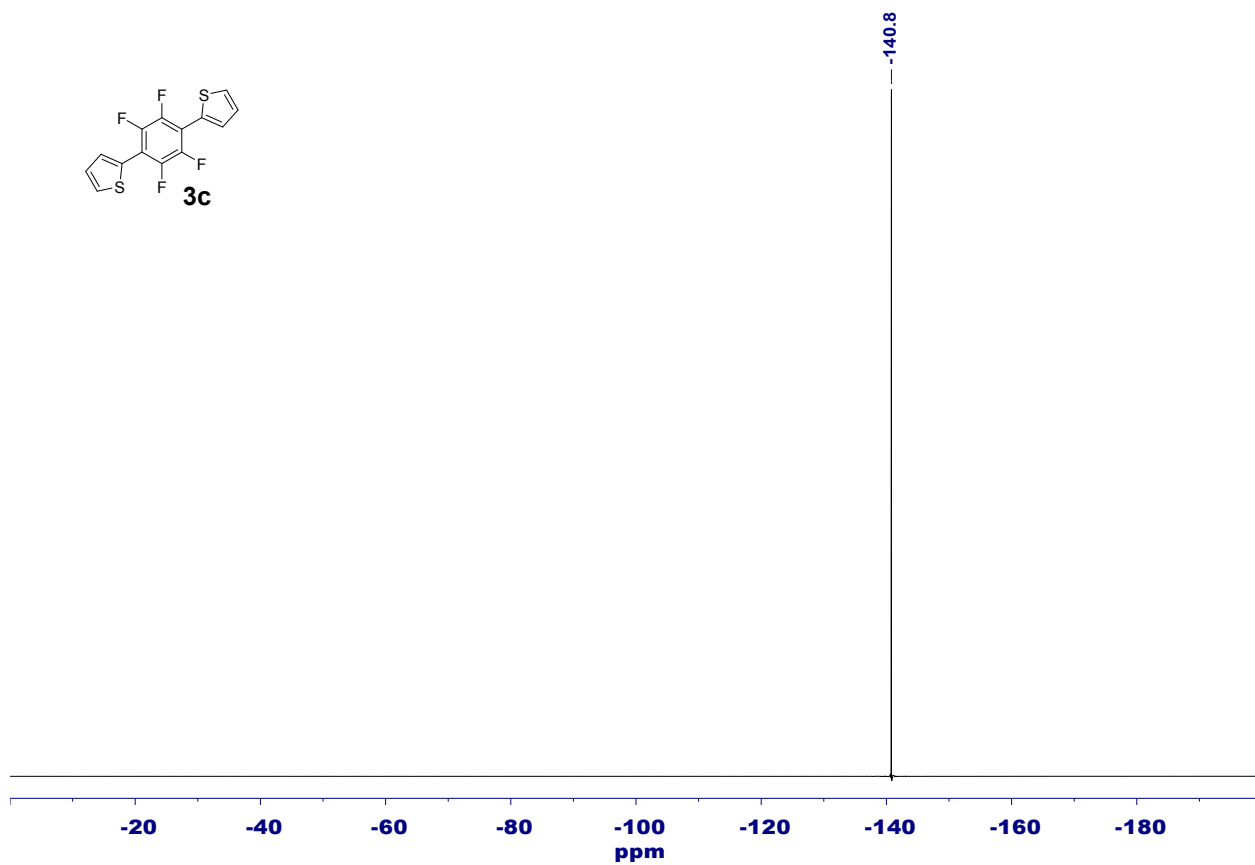

Figure S9.  $^{19}\text{F}\{^1\text{H}\}$  NMR spectrum of 1,4-di(thien-2-yl)-tetrafluorobenzene **3c** ( $\text{CDCl}_3$ , 376 MHz, 298 K).

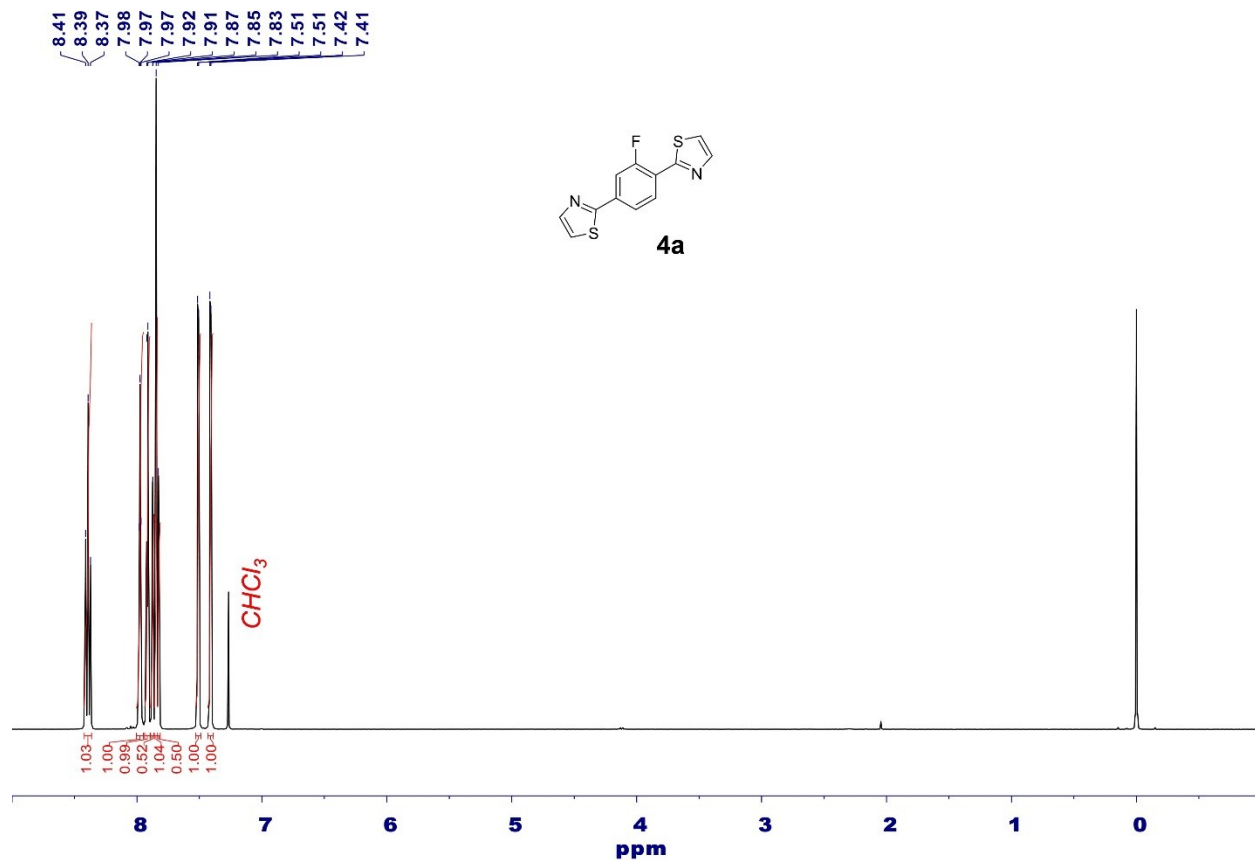

Figure S10.  $^1\text{H}$  NMR spectrum of 1,4-di(thiazol-2-yl)-2-fluorobenzene **4a** ( $\text{CDCl}_3$ , 600 MHz, 298 K).

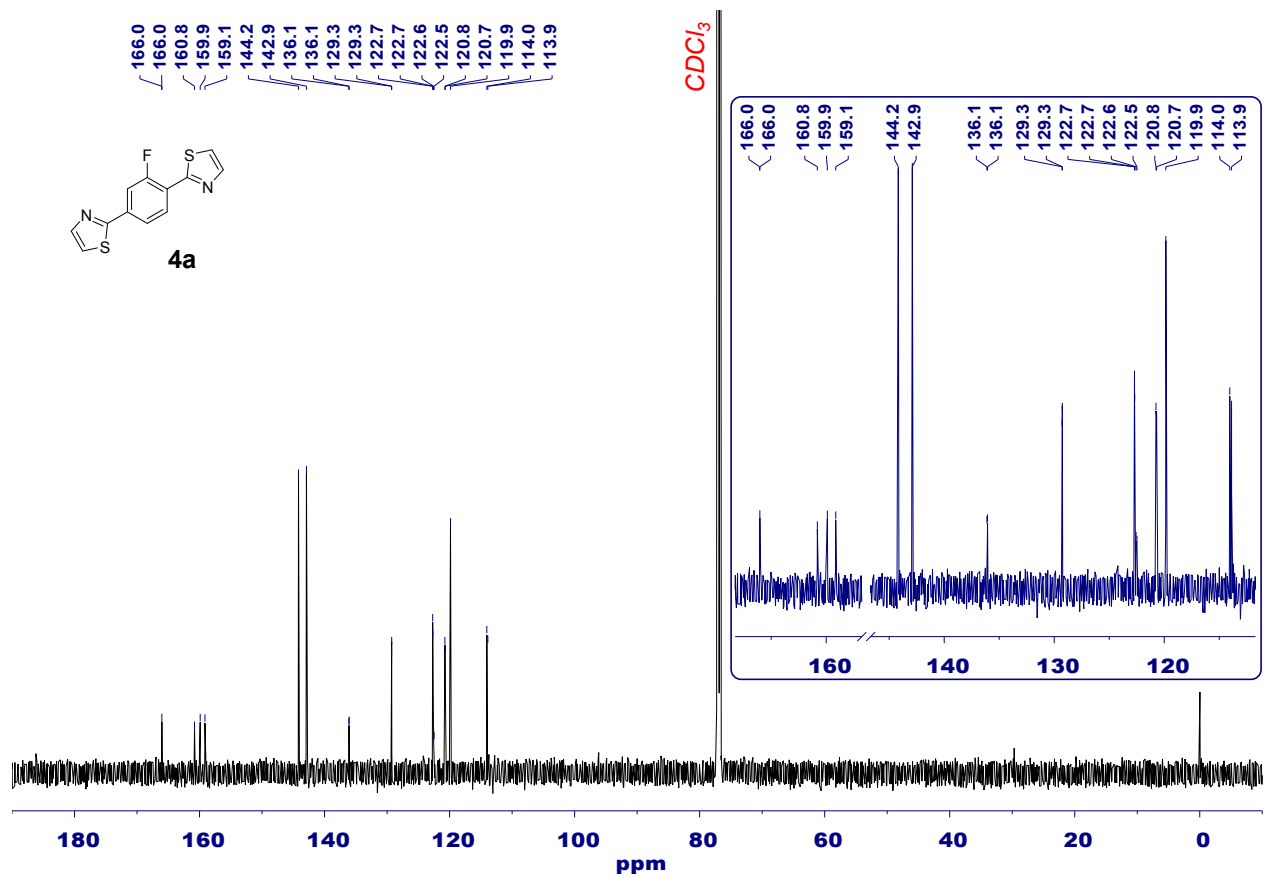

Figure S11.  $^{13}\text{C}\{^1\text{H}\}$  NMR spectrum of 1,4-di(thiazol-2-yl)-2-fluorobenzene **4a** (CDCl<sub>3</sub>, 150 MHz, 298 K).

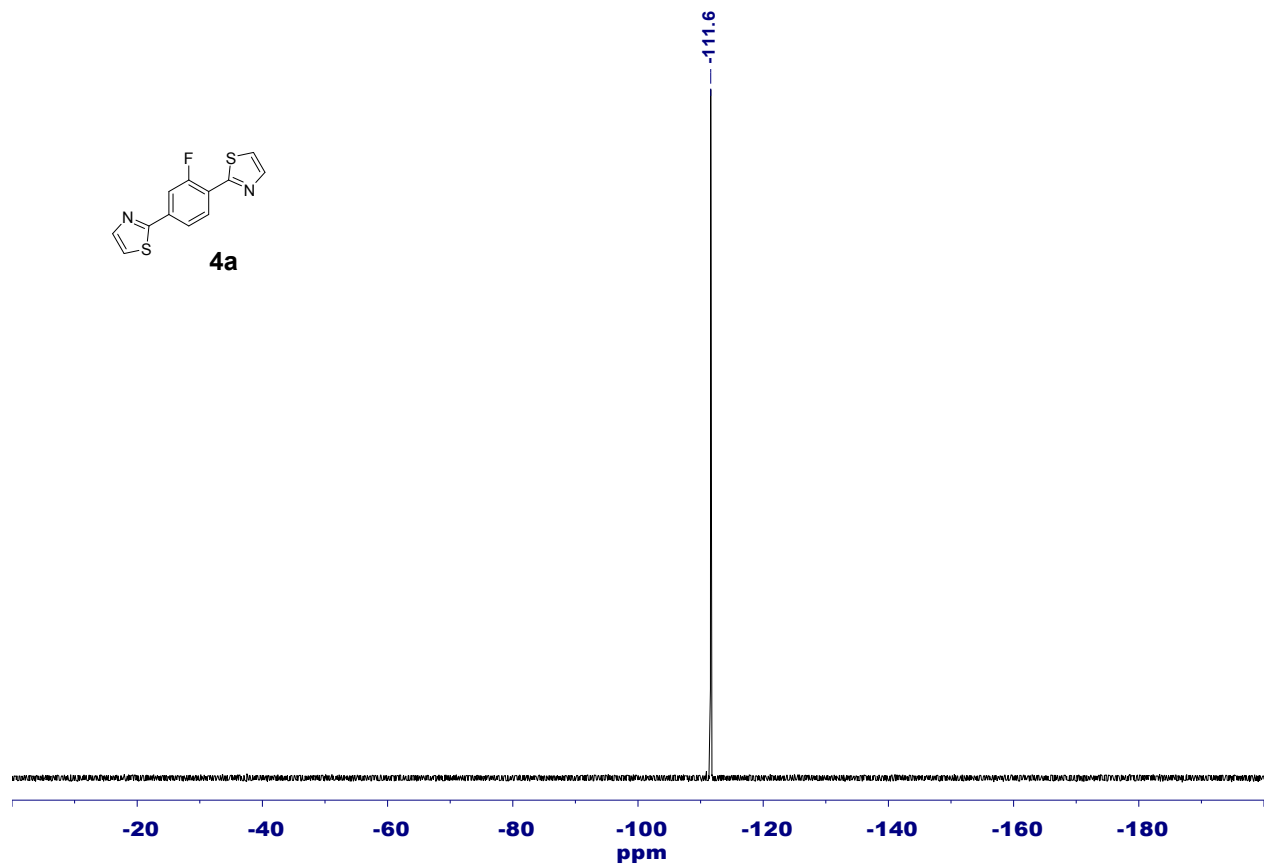

Figure S12.  $^{19}\text{F}\{^1\text{H}\}$  NMR spectrum of 1,4-di(thiazol-2-yl)-2-fluorobenzene **4a** (CDCl<sub>3</sub>, 564 MHz, 298 K).



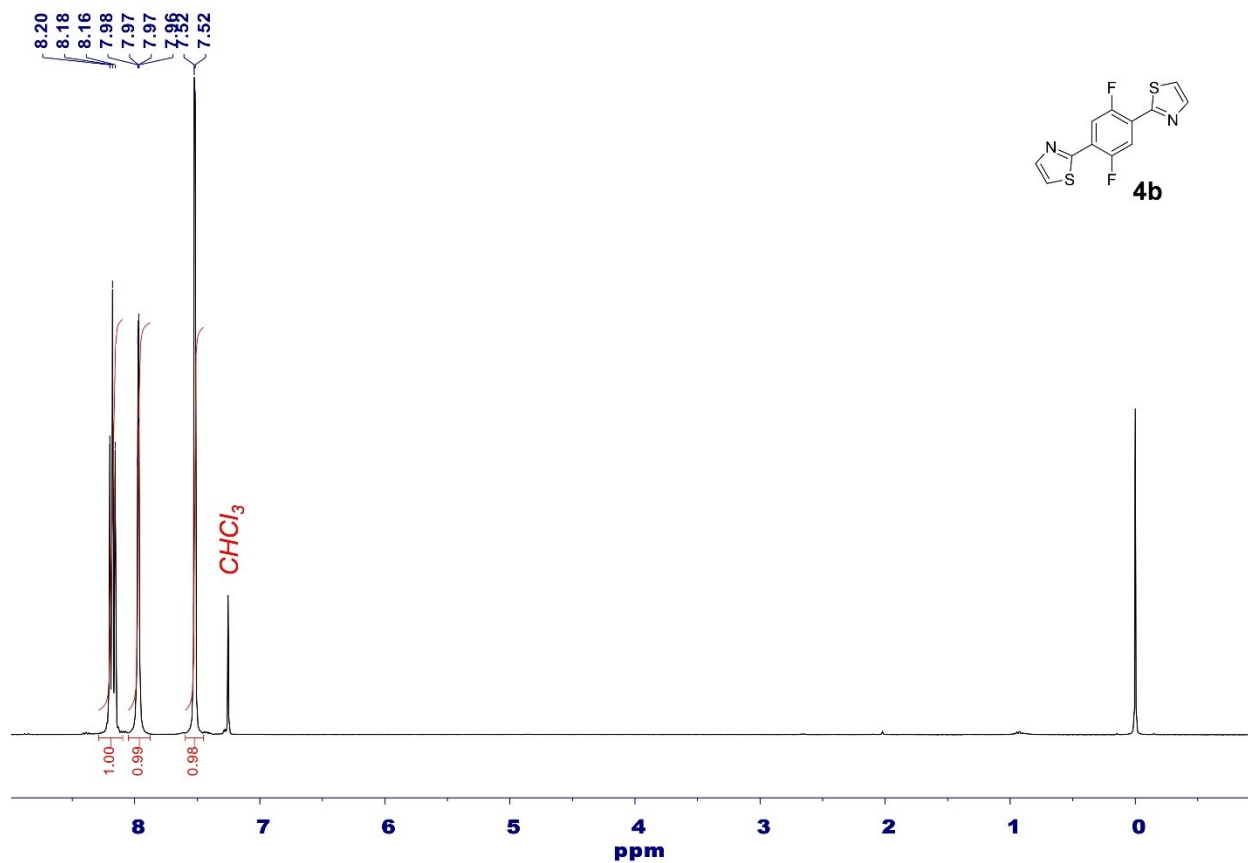

Figure S13. <sup>1</sup>H NMR spectrum of 1,4-di(thiazol-2-yl)-2,5-difluorobenzene **4b** (CDCl<sub>3</sub>, 400 MHz, 323 K).

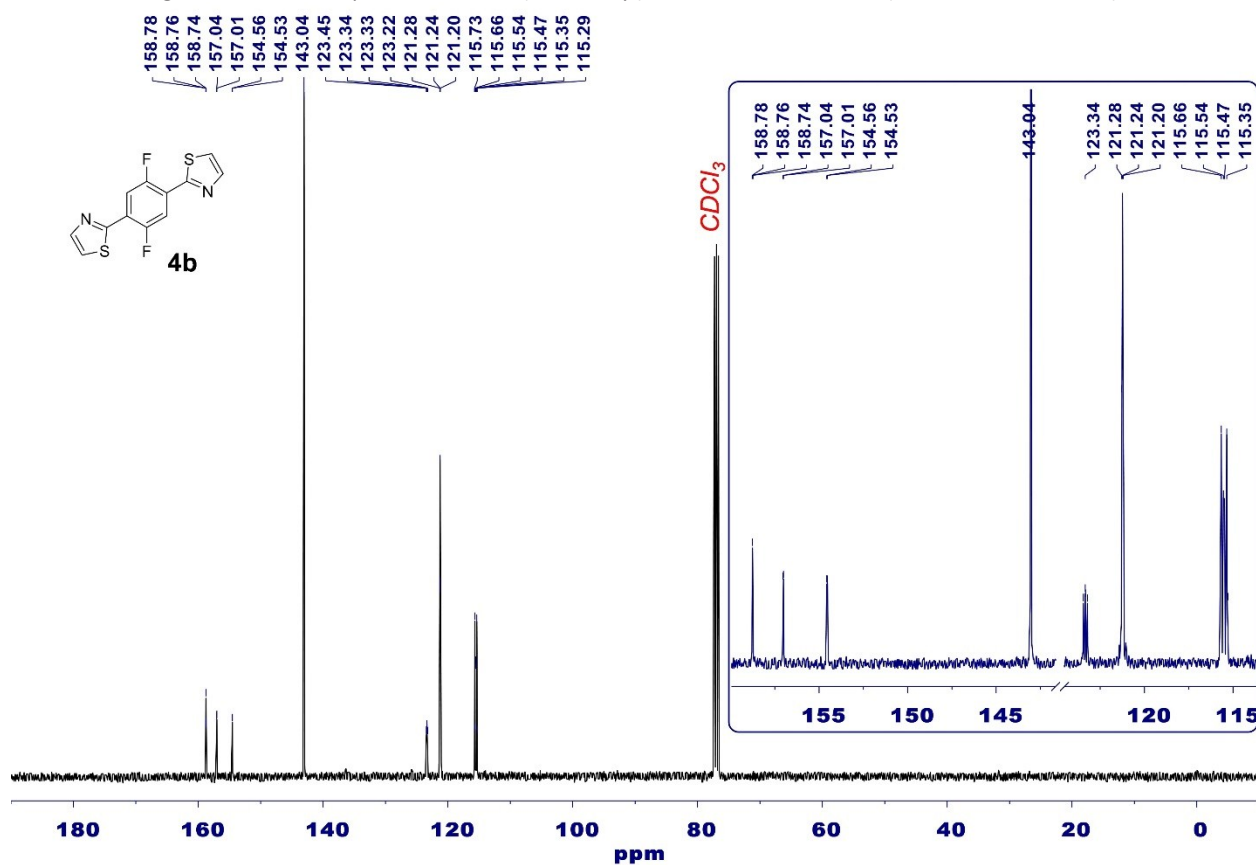

Figure S14. <sup>13</sup>C{<sup>1</sup>H} NMR spectrum of 1,4-di(thiazol-2-yl)-2,5-difluorobenzene **4b** (CDCl<sub>3</sub>, 100 MHz, 323 K).

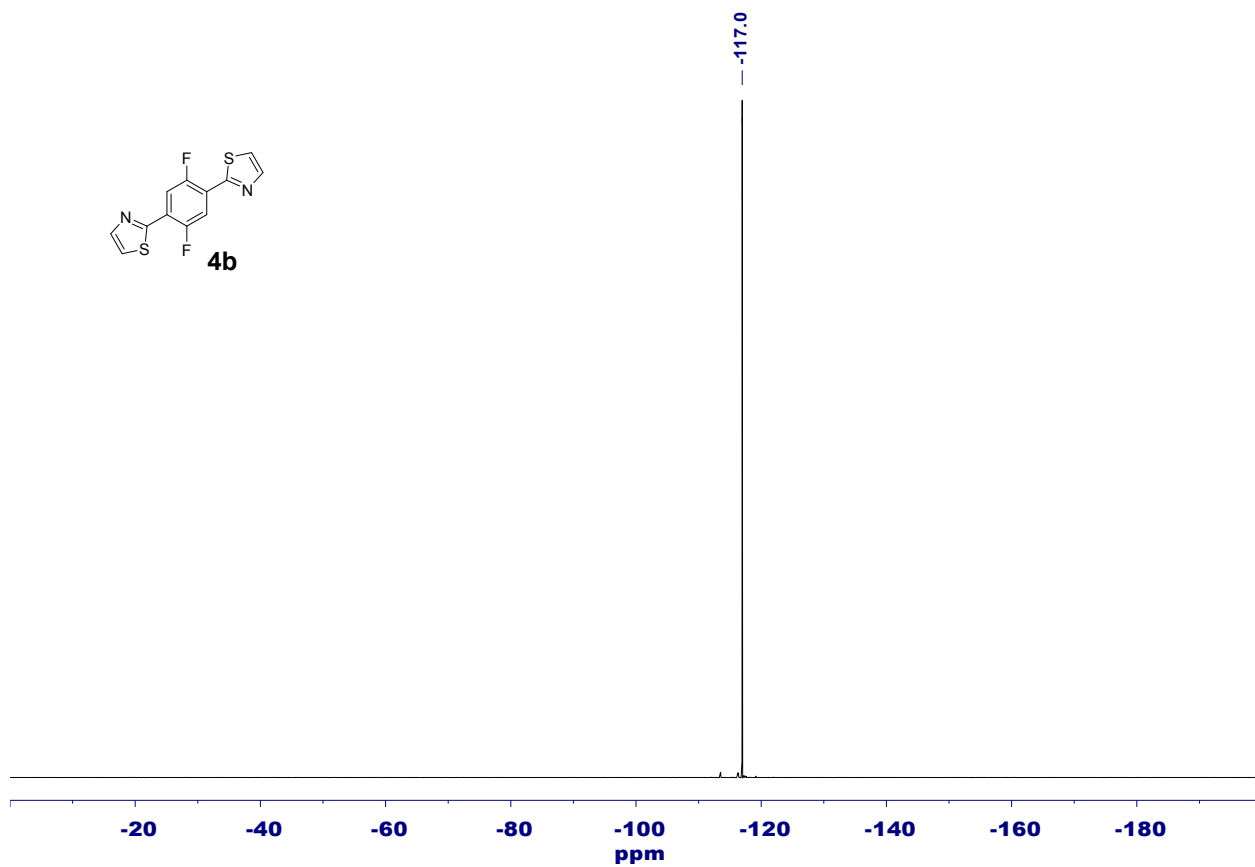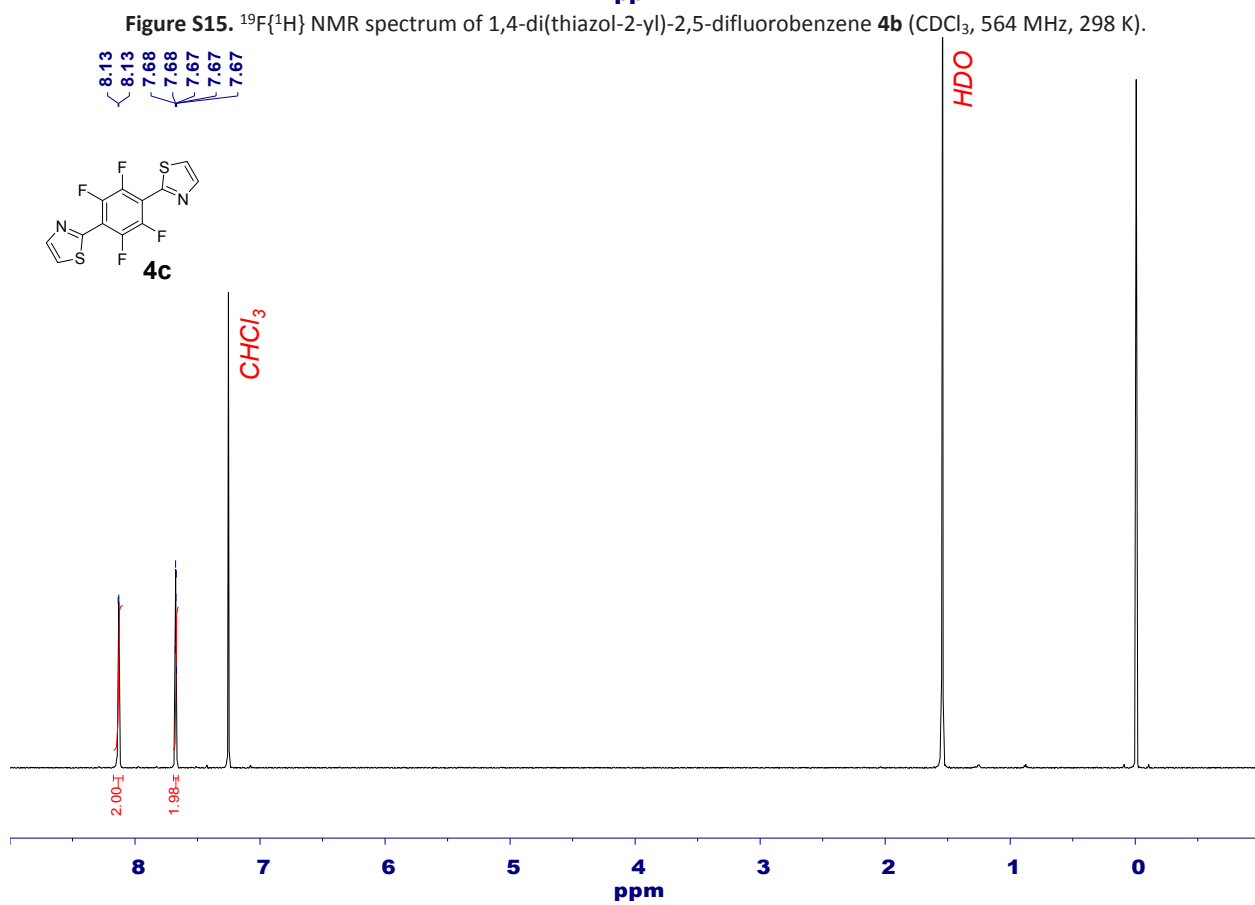

Figure S16.  $^1\text{H}$  NMR spectrum of 1,4-di(thiazol-2-yl)-tetrafluorobenzene **4c** ( $\text{CDCl}_3$ , 600 MHz, 298 K).

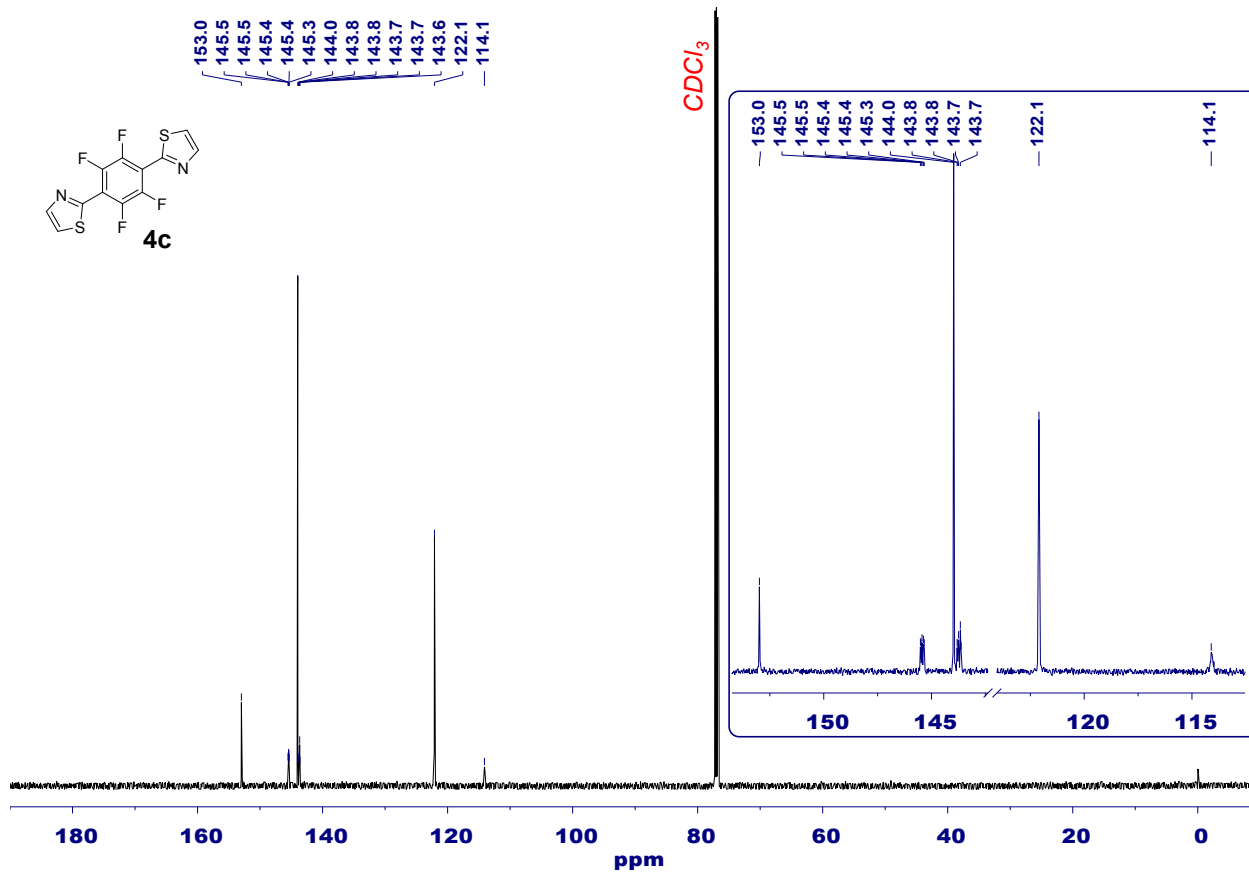

Figure S17.  $^{13}\text{C}\{^1\text{H}\}$  NMR spectrum of 1,4-di(thiazol-2-yl)-tetrafluorobenzene **4c** (CDCl<sub>3</sub>, 150 MHz, 298 K).

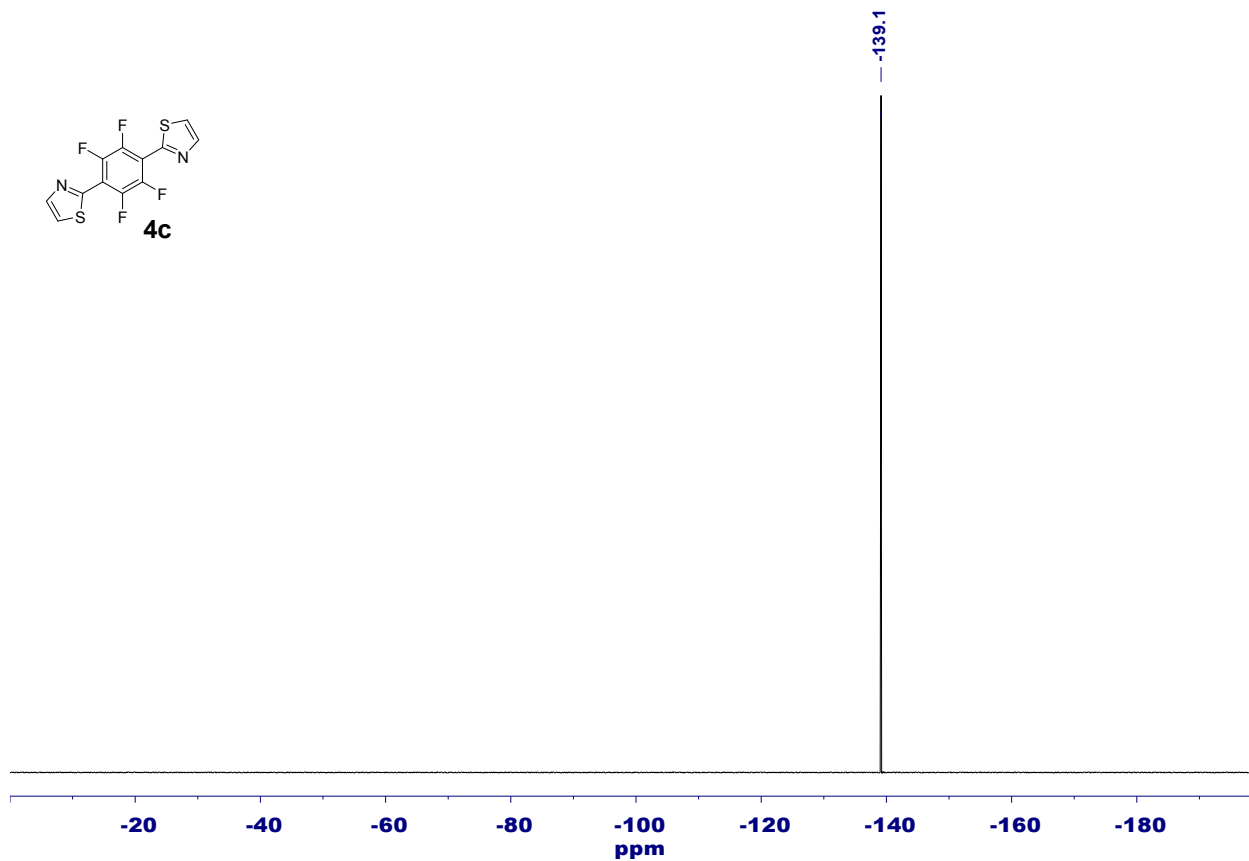

Figure S18.  $^{19}\text{F}\{^1\text{H}\}$  NMR spectrum of 1,4-di(thiazol-2-yl)-tetrafluorobenzene **4c** (CDCl<sub>3</sub>, 564 MHz, 298 K).

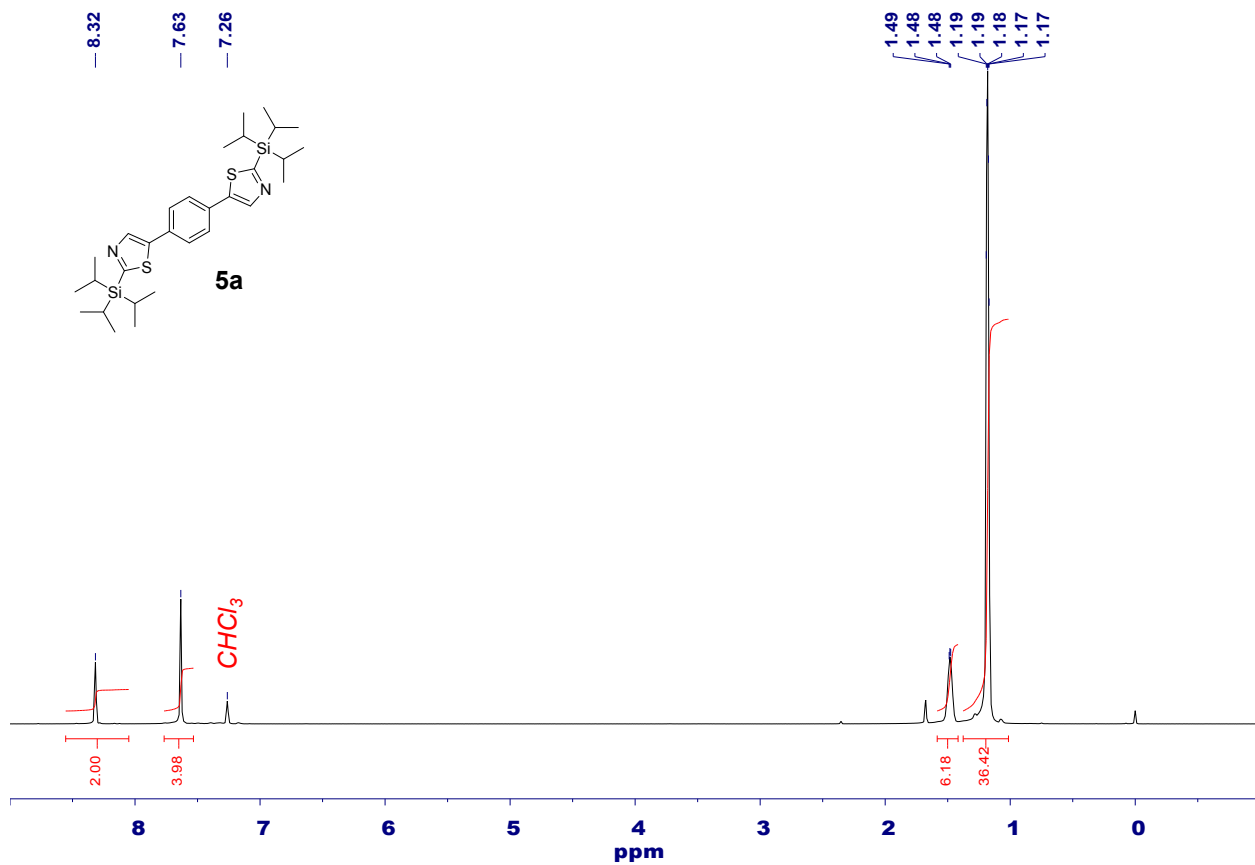

Figure S19. <sup>1</sup>H NMR spectrum of 1,4-di(2-(triisopropylsilyl)thiazol-5-yl)benzene **5a** (CDCl<sub>3</sub>, 400 MHz, 298 K).

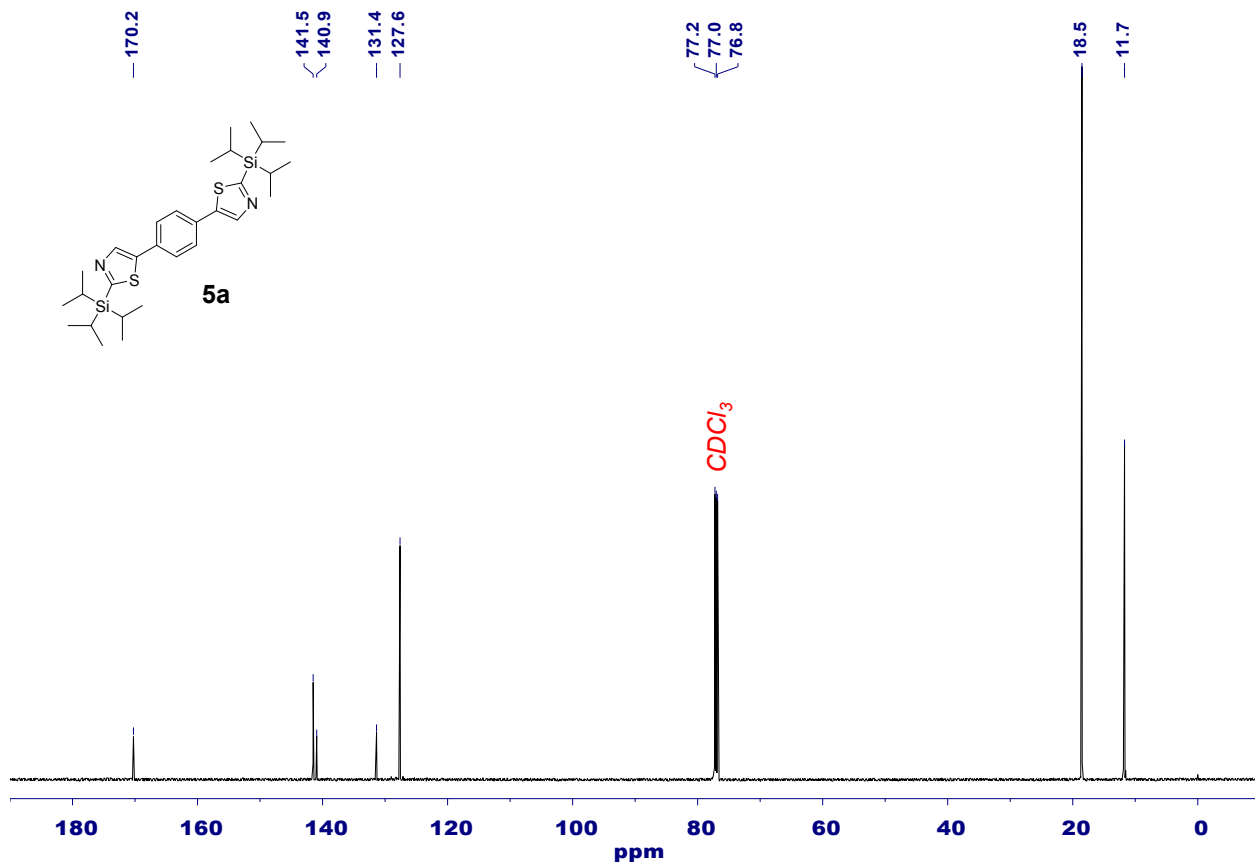

Figure S20. <sup>13</sup>C{<sup>1</sup>H} NMR spectrum of 1,4-di(2-(triisopropylsilyl)thiazol-5-yl)benzene **5a** (CDCl<sub>3</sub>, 100 MHz, 298 K).

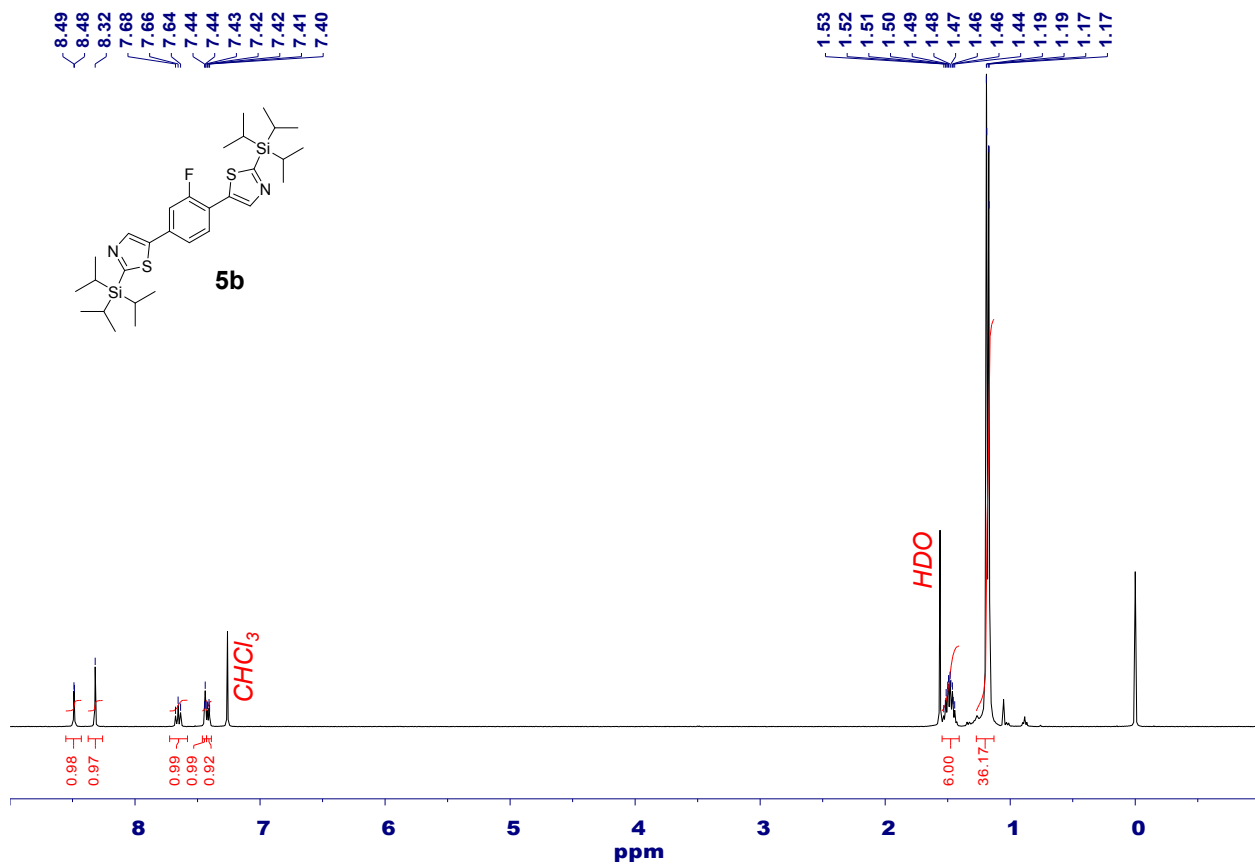

Figure S21. <sup>1</sup>H NMR spectrum of 1,4-di(2-(triisopropylsilyl)thiazol-5-yl)-2-fluorobenzene **5b** (CDCl<sub>3</sub>, 400 MHz, 298 K).

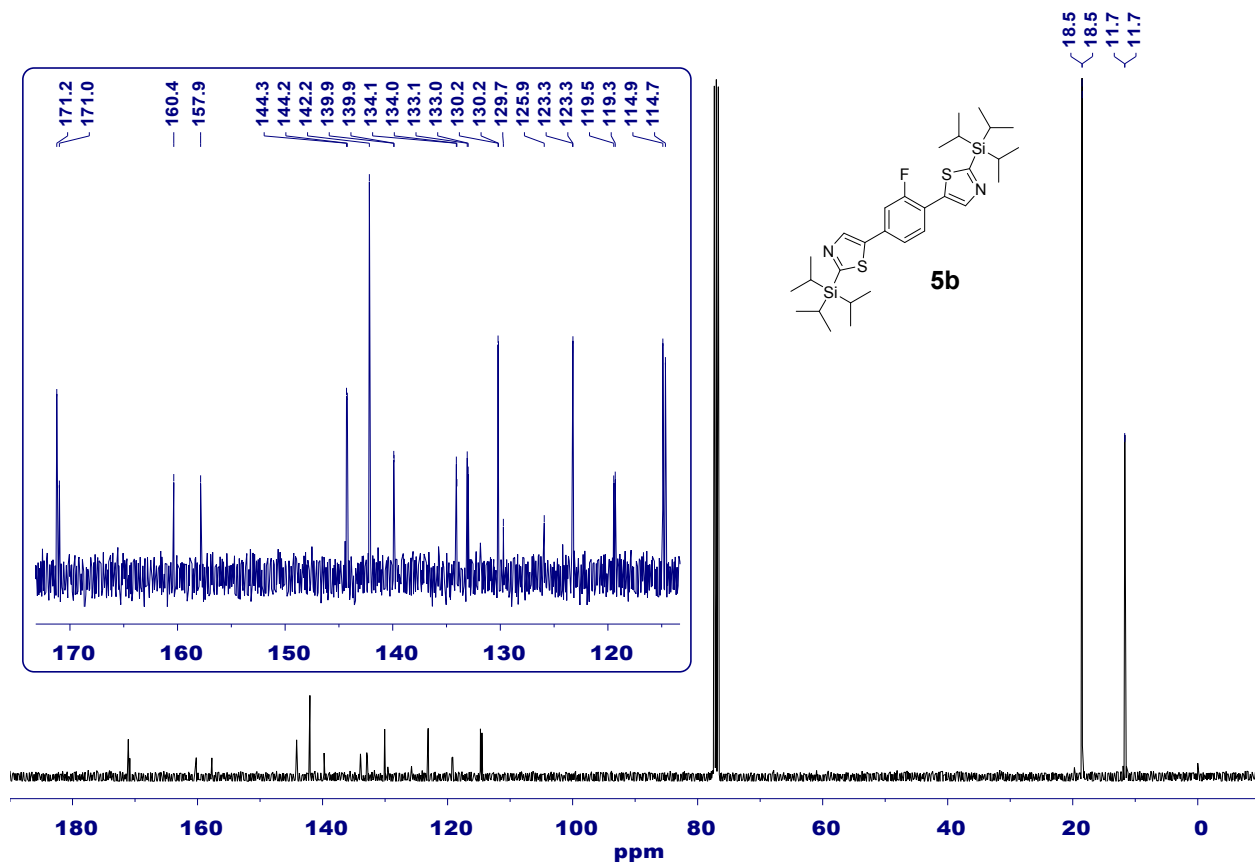

Figure S22. <sup>13</sup>C{<sup>1</sup>H} NMR spectrum of 1,4-di(2-(triisopropylsilyl)thiazol-5-yl)-2-fluorobenzene **5b** (CDCl<sub>3</sub>, 150 MHz, 298 K).

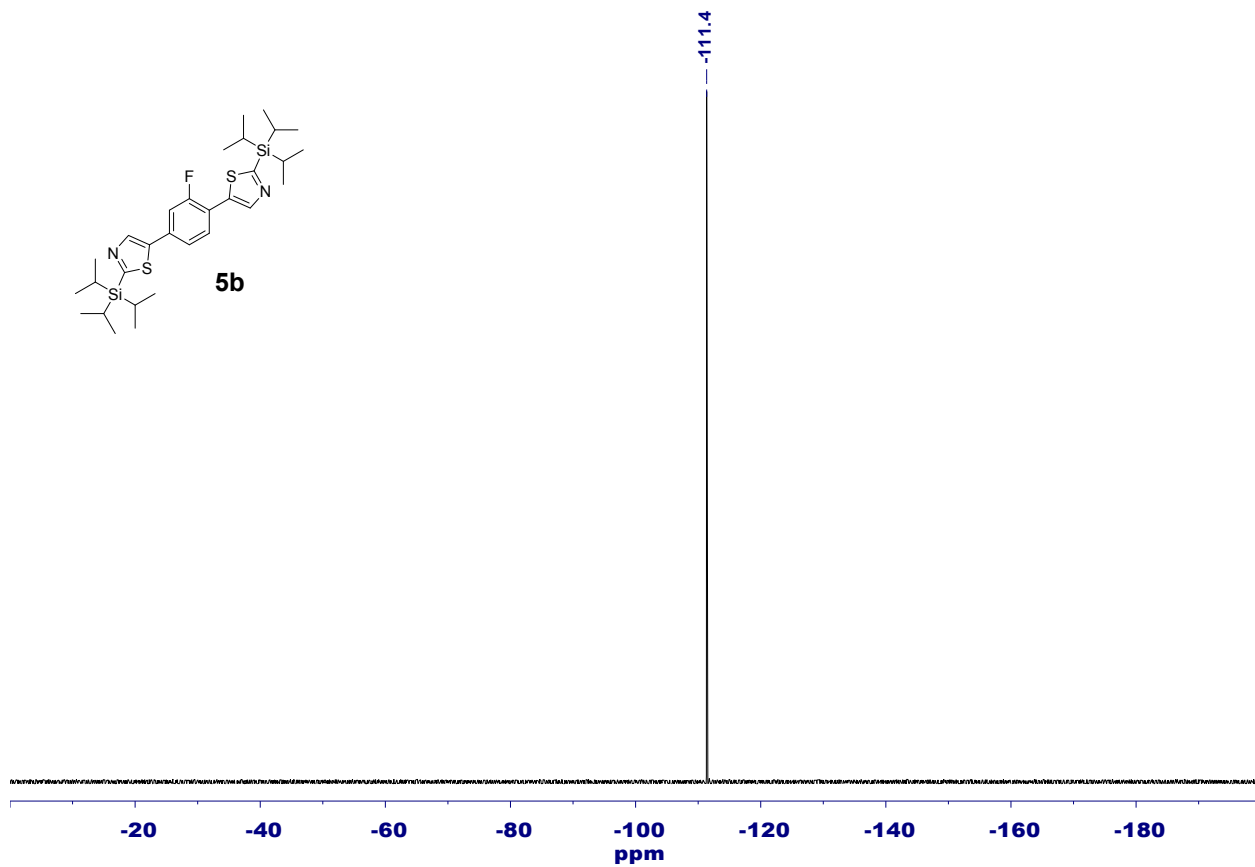

Figure S23.  $^{19}\text{F}\{^1\text{H}\}$  NMR spectrum of 1,4-di(2-(triisopropylsilyl)thiazol-5-yl)-2-fluorobenzene **5b** ( $\text{CDCl}_3$ , 376 MHz, 298 K).

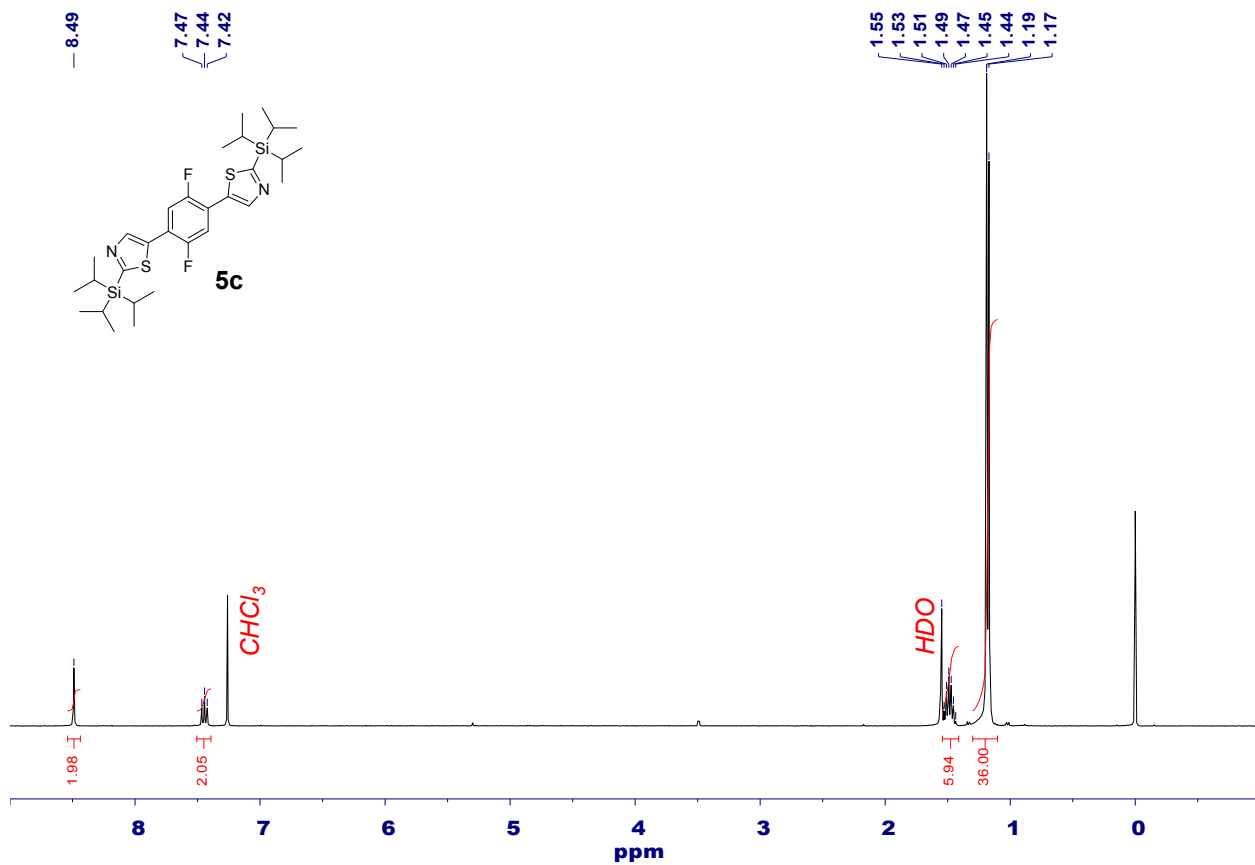

Figure S24.  $^1\text{H}$  NMR spectrum of 1,4-di(2-(triisopropylsilyl)thiazol-5-yl)-2,5-difluorobenzene **5c** ( $\text{CDCl}_3$ , 400 MHz, 298 K).

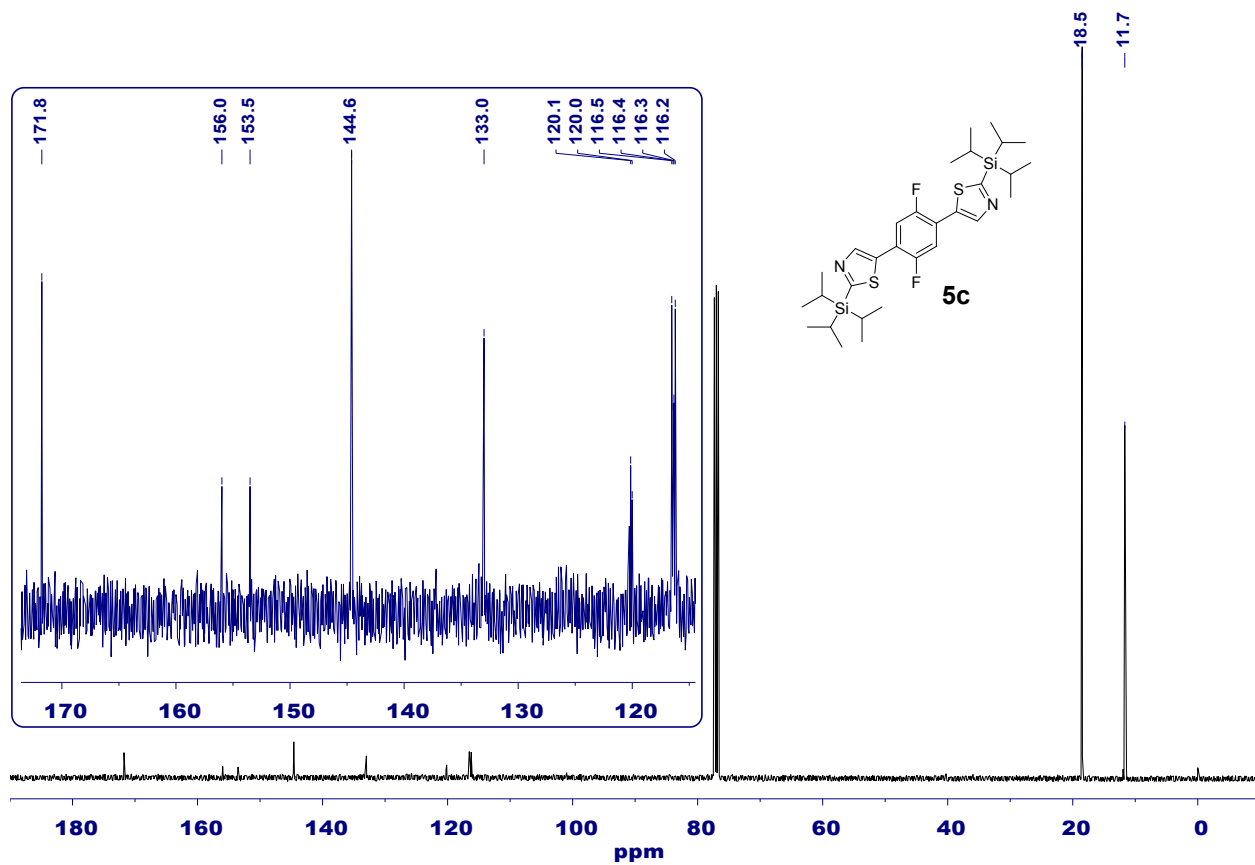

Figure S25.  $^{13}\text{C}\{^1\text{H}\}$  NMR spectrum of 1,4-di(2-(triisopropylsilyl)thiazol-5-yl)-2,5-difluorobenzene **5c** ( $\text{CDCl}_3$ , 150 MHz, 298 K).

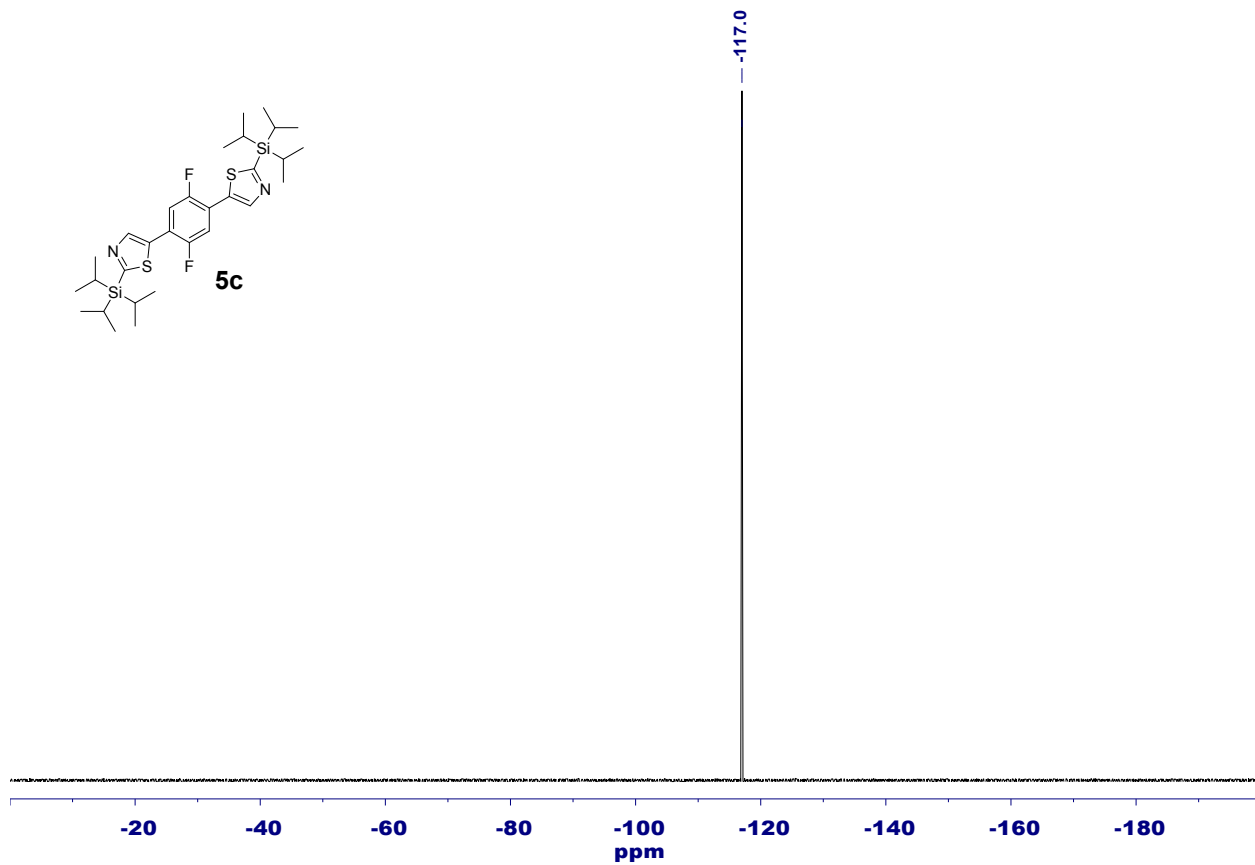

Figure S26.  $^{19}\text{F}\{^1\text{H}\}$  NMR spectrum of 1,4-di(2-(triisopropylsilyl)thiazol-5-yl)-2,5-difluorobenzene **5c** ( $\text{CDCl}_3$ , 376 MHz, 298 K).

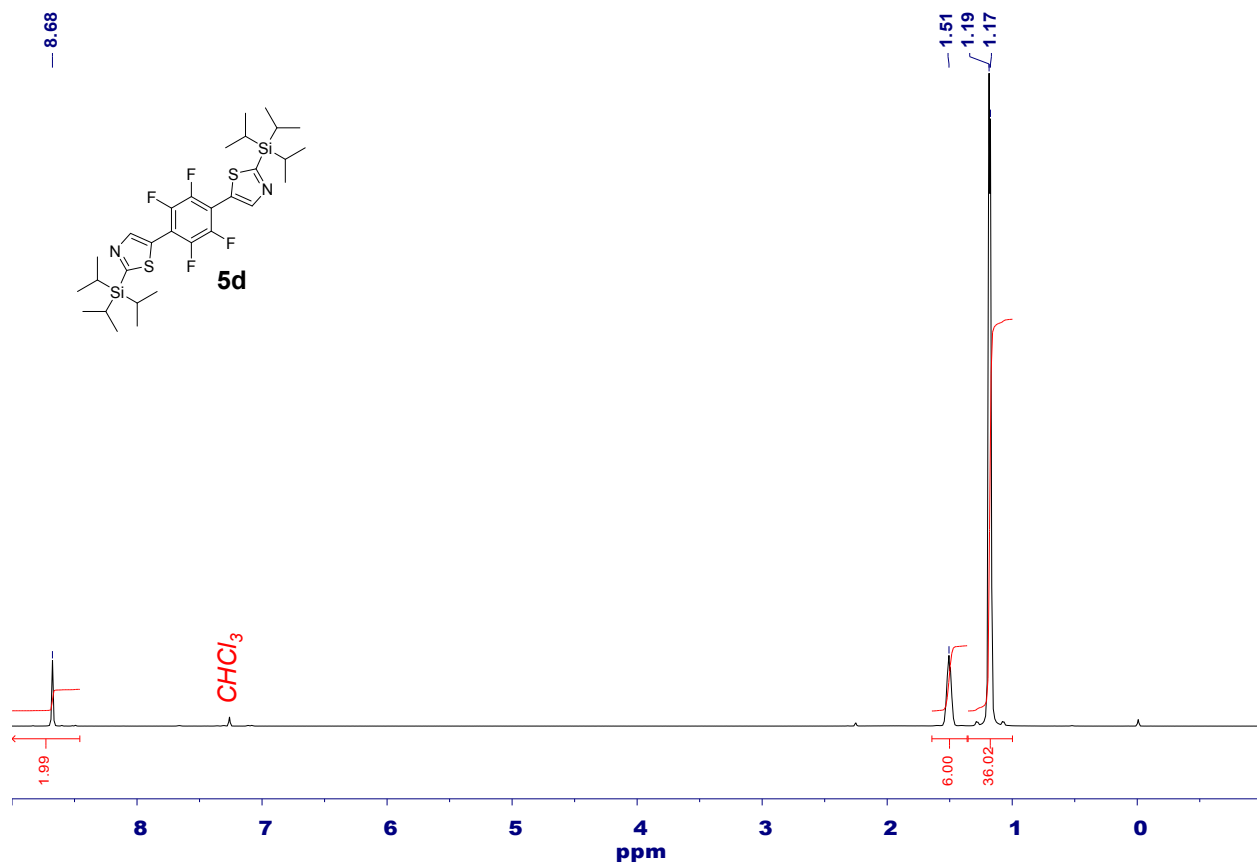

Figure S27.  $^1\text{H}$  NMR spectrum of 1,4-di(2-(triisopropylsilyl)thiazol-5-yl)-tetrafluorobenzene **5d** ( $\text{CDCl}_3$ , 600 MHz, 298 K).

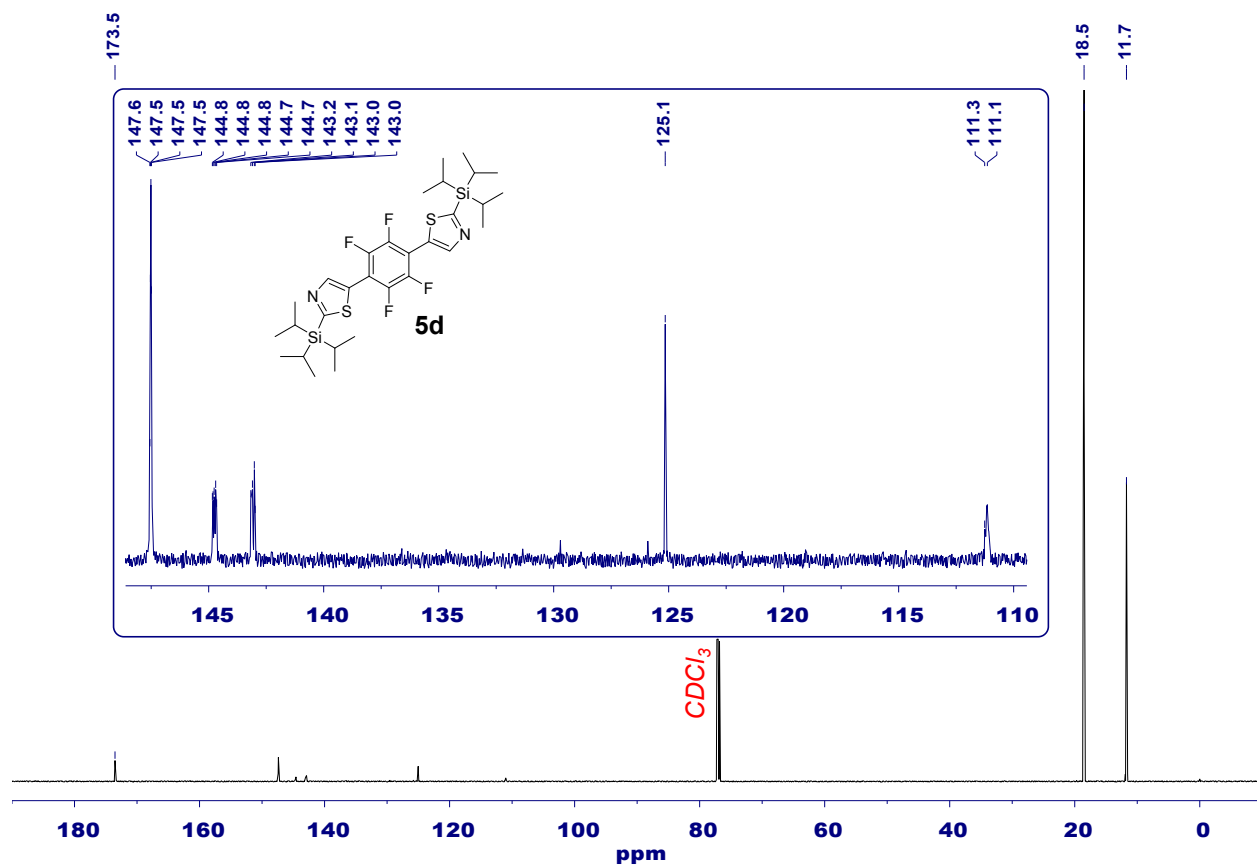

Figure S28.  $^{13}\text{C}\{^1\text{H}\}$  NMR spectrum of 1,4-di(2-(triisopropylsilyl)thiazol-5-yl)-tetrafluorobenzene **5d** ( $\text{CDCl}_3$ , 150 MHz, 298 K).



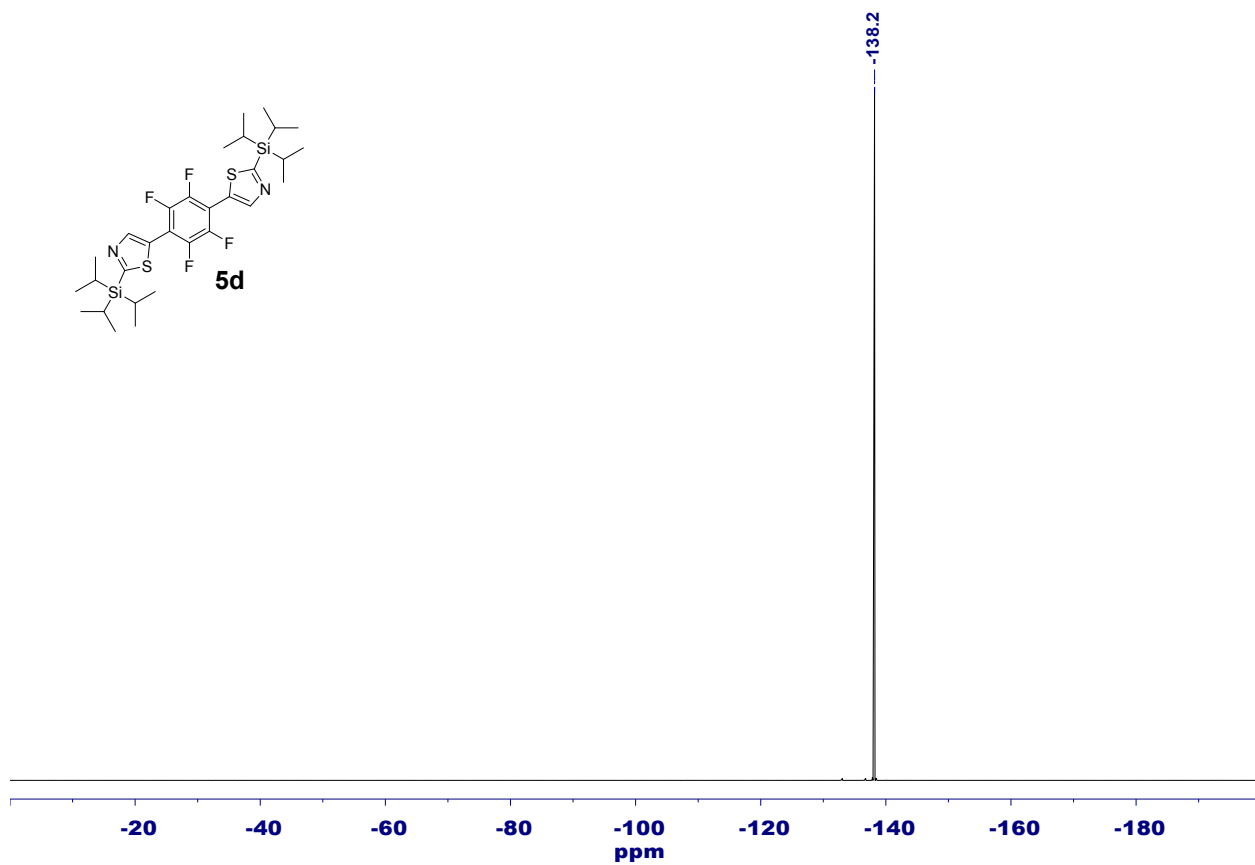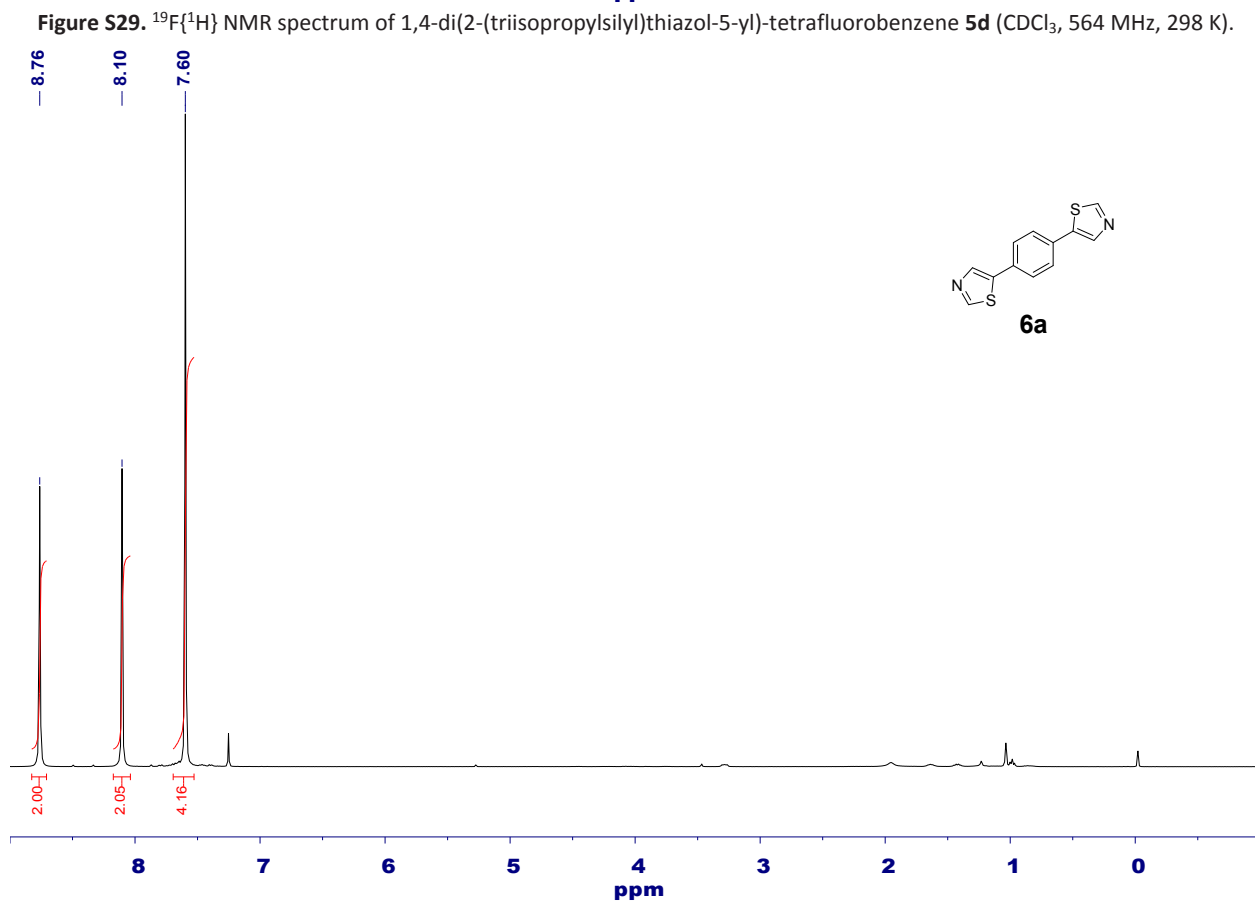

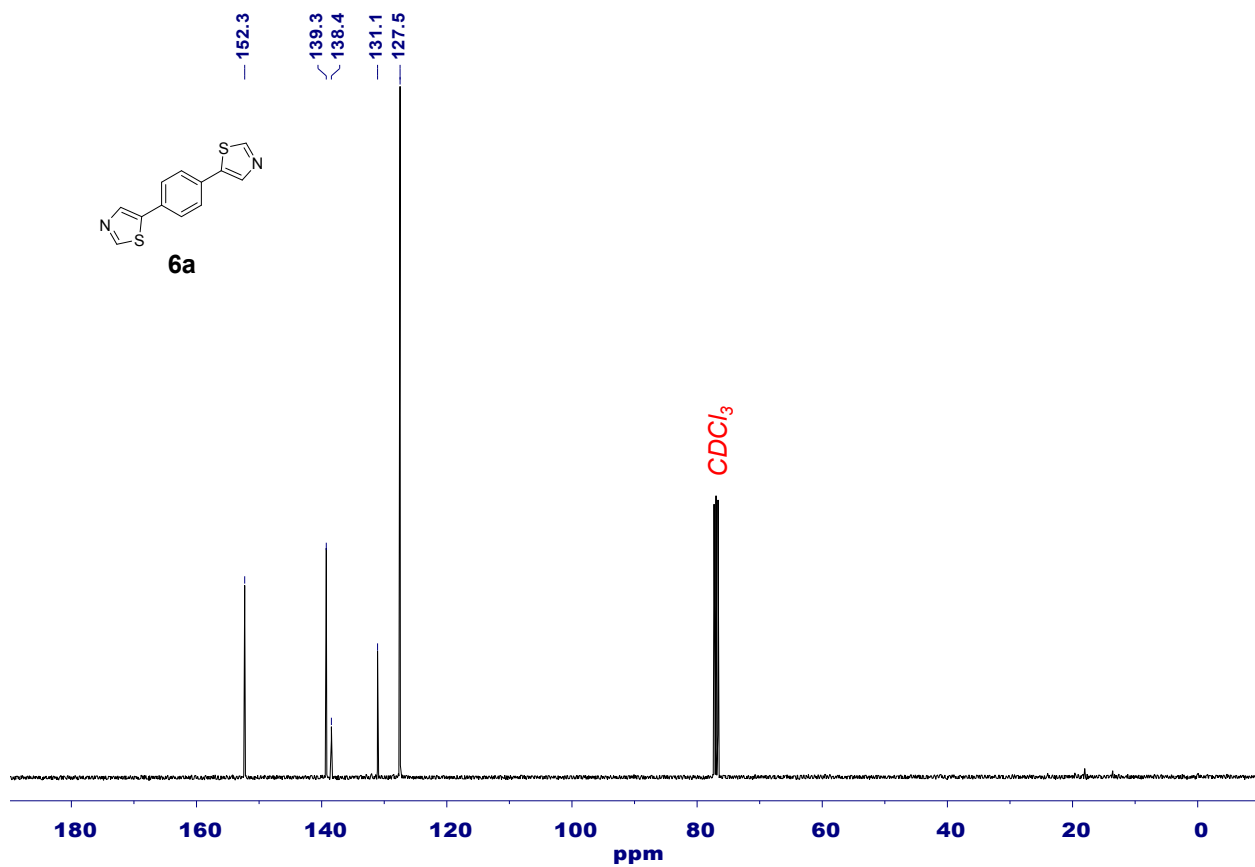

Figure S31.  $^{13}\text{C}\{^1\text{H}\}$  NMR spectrum of 1,4-di(thiazol-5-yl)-benzene **6a** ( $\text{CDCl}_3$ , 150 MHz, 298 K).

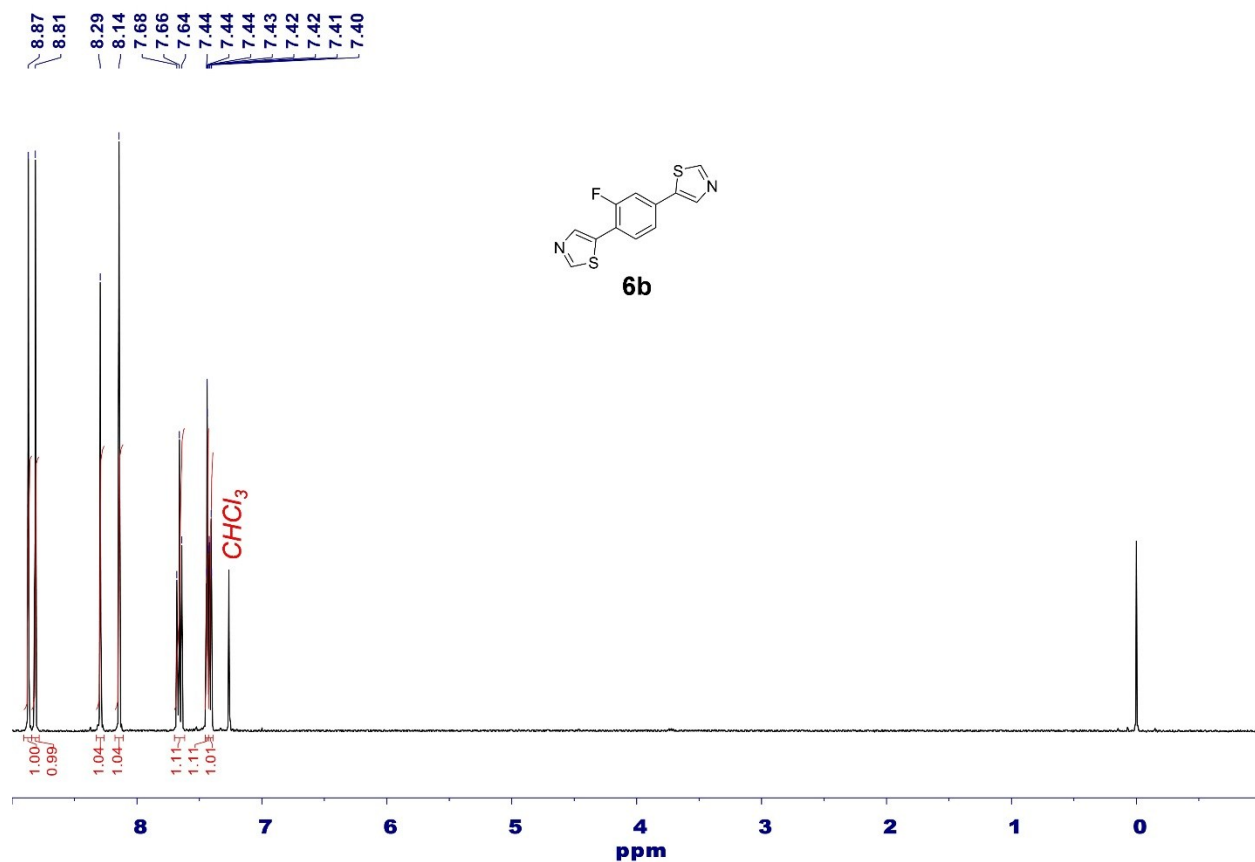

Figure S32.  $^1\text{H}$  NMR spectrum of 1,4-di(thiazol-5-yl)-2-fluorobenzene **6b** ( $\text{CDCl}_3$ , 400 MHz, 298 K).

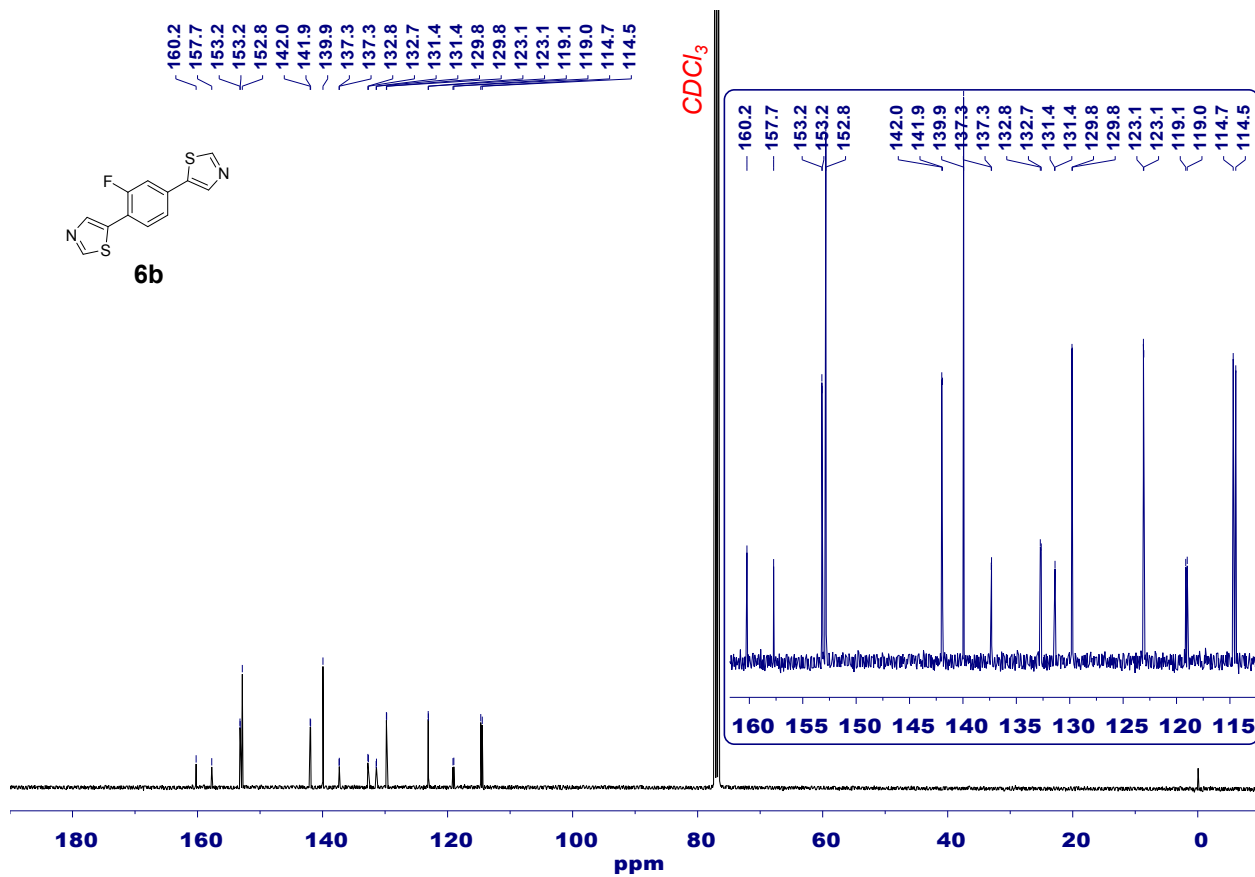

Figure S33.  $^{13}\text{C}\{^1\text{H}\}$  NMR spectrum of 1,4-di(thiazol-5-yl)-2-fluorobenzene **6b** (CDCl<sub>3</sub>, 150 MHz, 298 K).

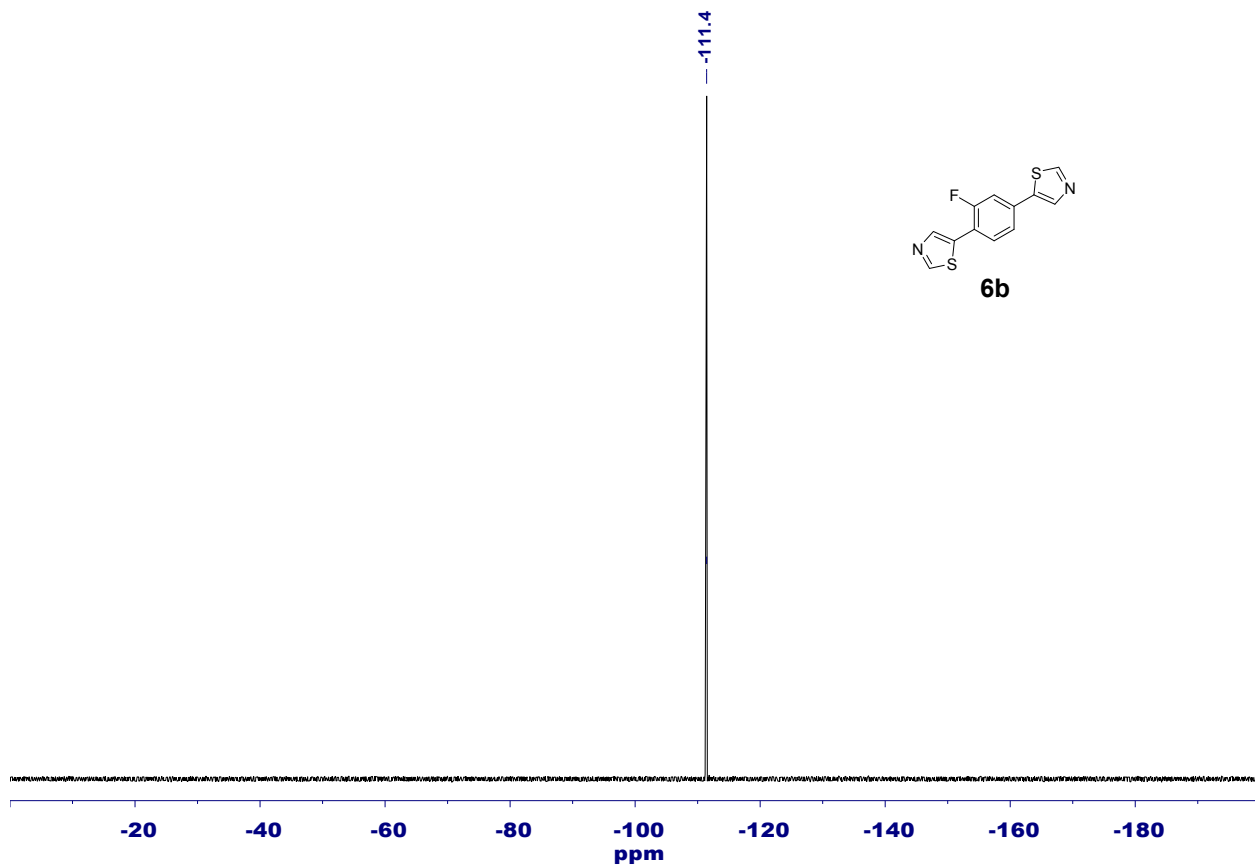

Figure S34.  $^{19}\text{F}\{^1\text{H}\}$  NMR spectrum of 1,4-di(thiazol-5-yl)-2-fluorobenzene **6b** (CDCl<sub>3</sub>, 376 MHz, 298 K).

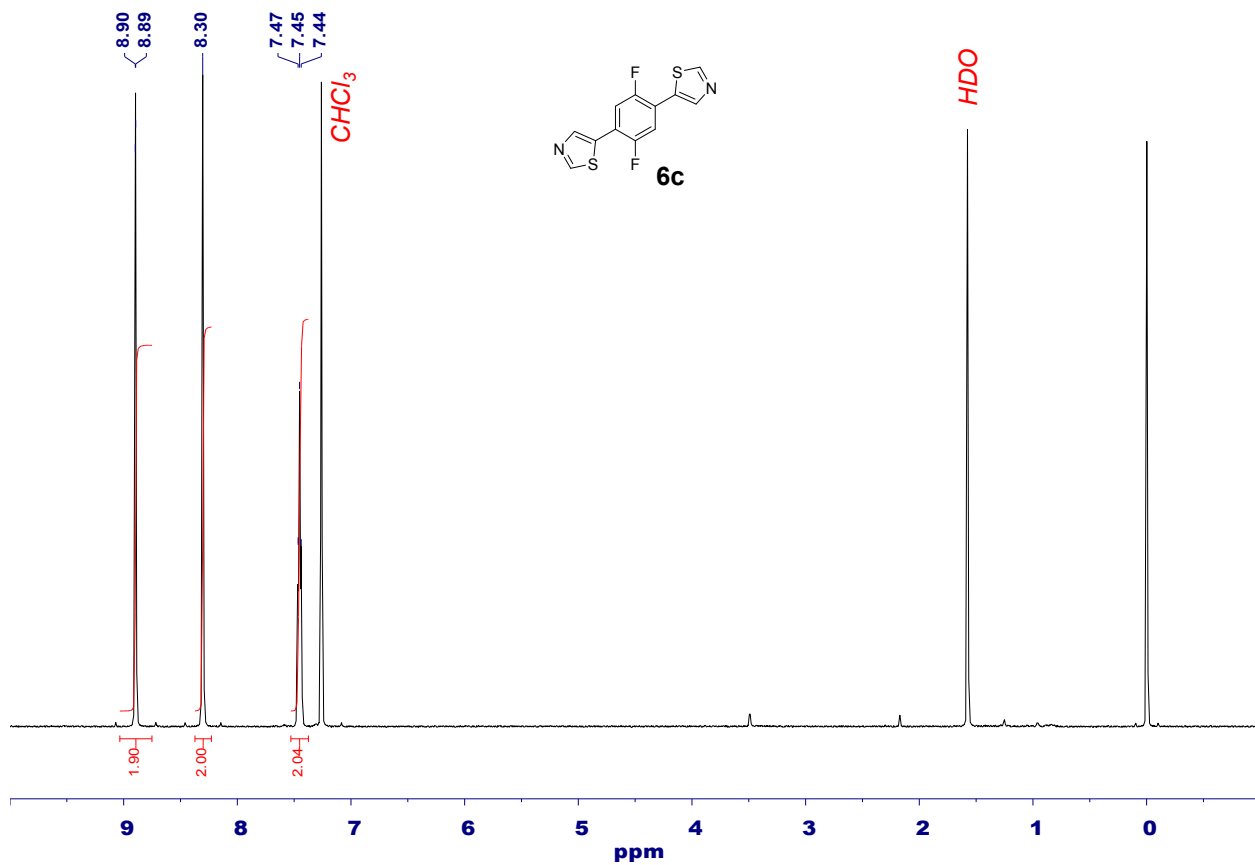

Figure S35. <sup>1</sup>H NMR spectrum of 1,4-di(thiazol-5-yl)-2,5-difluorobenzene **6c** (CDCl<sub>3</sub>, 600 MHz, 298 K).

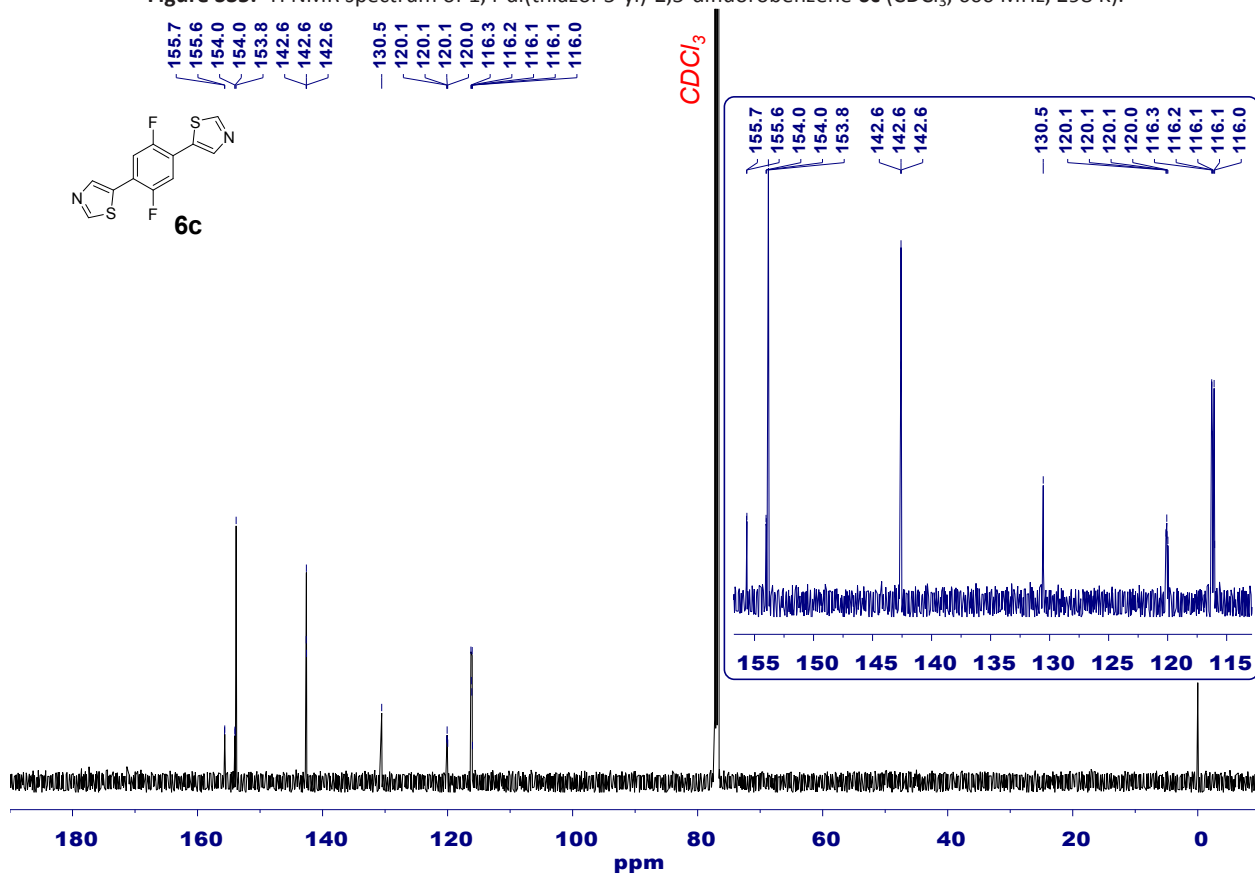

Figure S36. <sup>13</sup>C{<sup>1</sup>H} NMR spectrum of 1,4-di(thiazol-5-yl)-2,5-difluorobenzene **6c** (CDCl<sub>3</sub>, 150 MHz, 298 K).

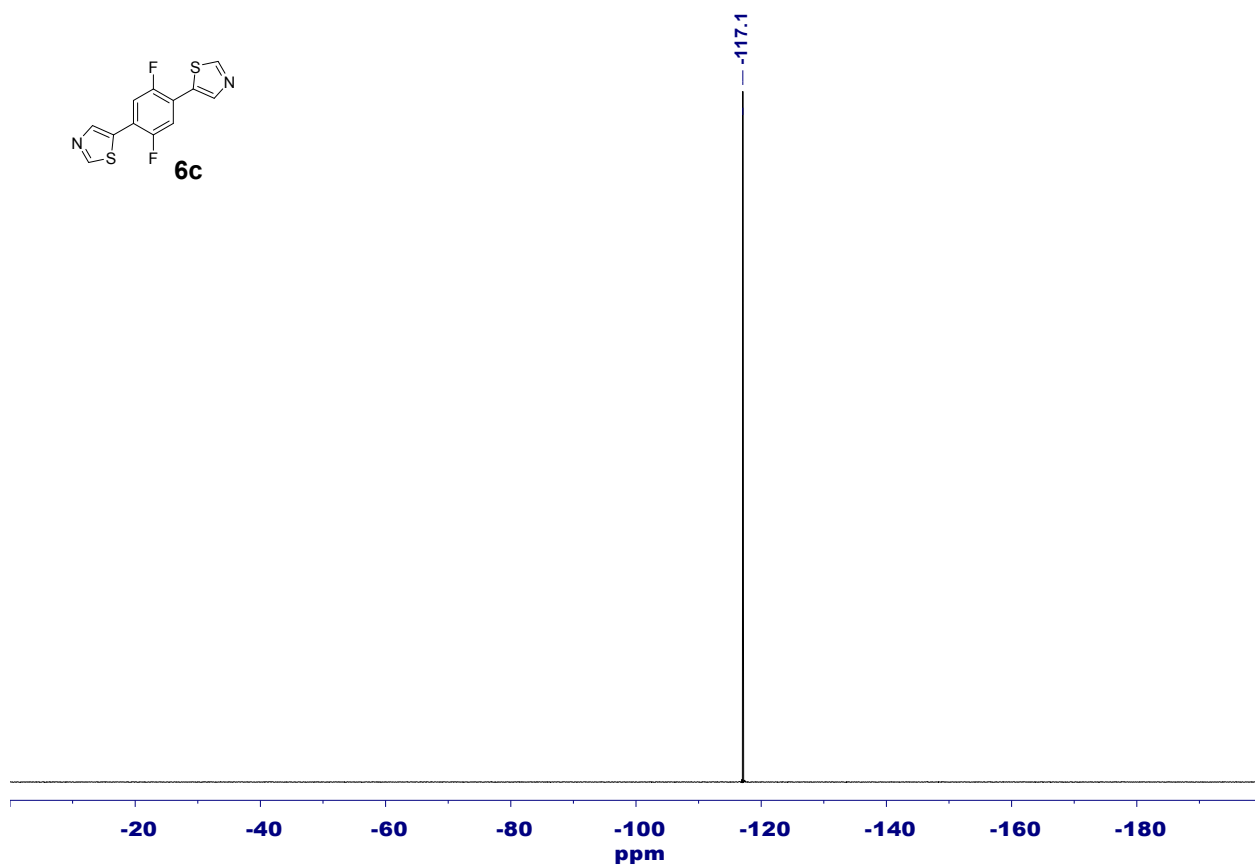

Figure S37.  $^{19}\text{F}\{^1\text{H}\}$  NMR spectrum of 1,4-di(thiazol-5-yl)-2,5-difluorobenzene **6c** ( $\text{CDCl}_3$ , 564 MHz, 298 K).

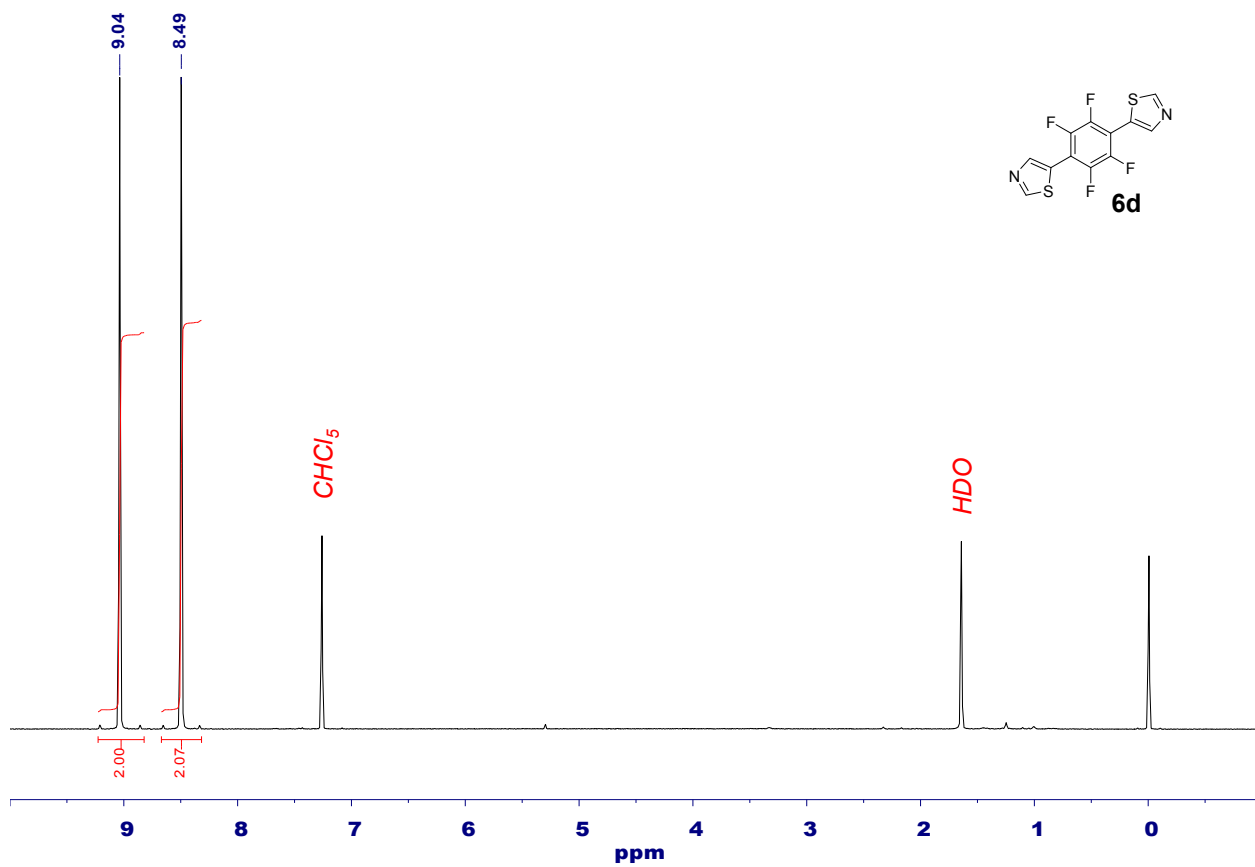

Figure S38.  $^1\text{H}$  NMR spectrum of 1,4-di(thiazol-5-yl)-tetrafluorobenzene **6d** ( $\text{CDCl}_3$ , 600 MHz, 298 K).

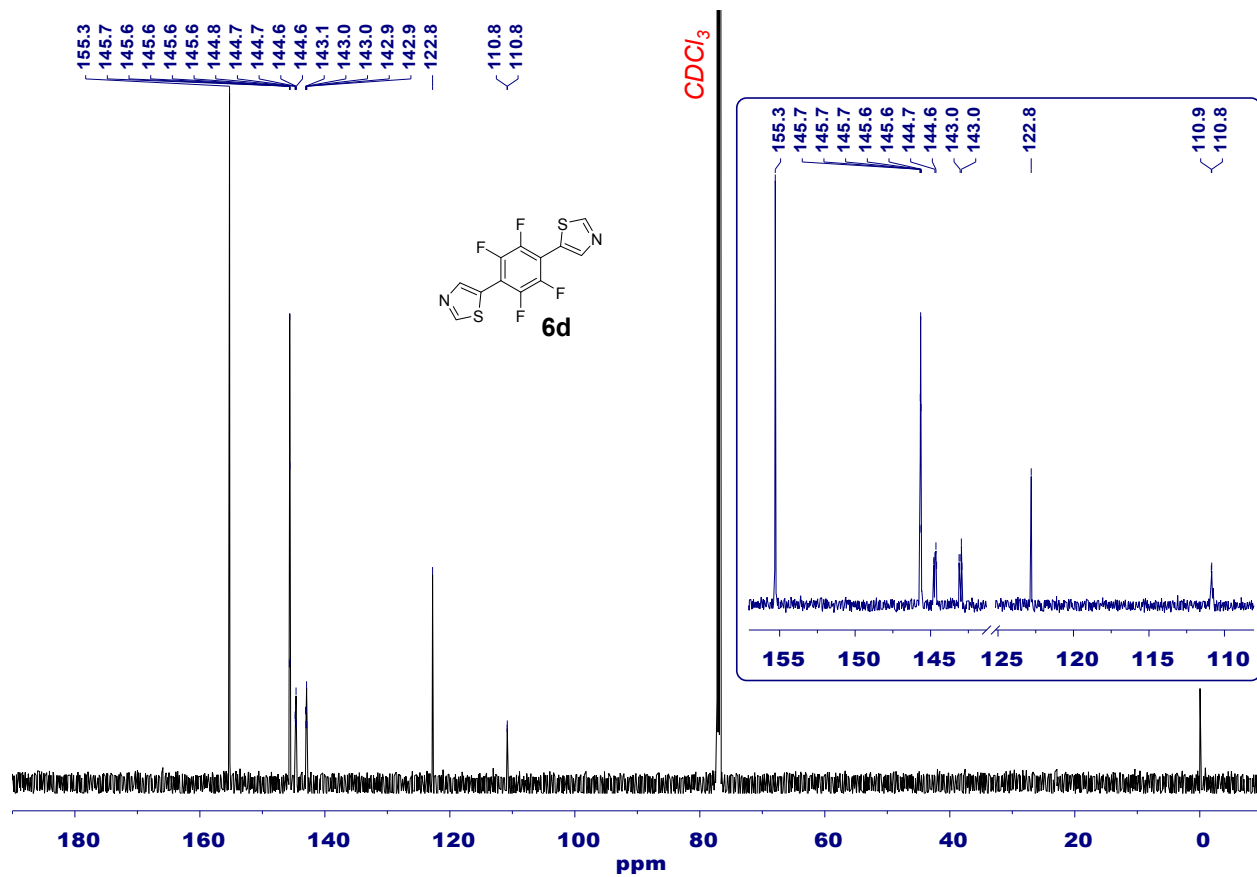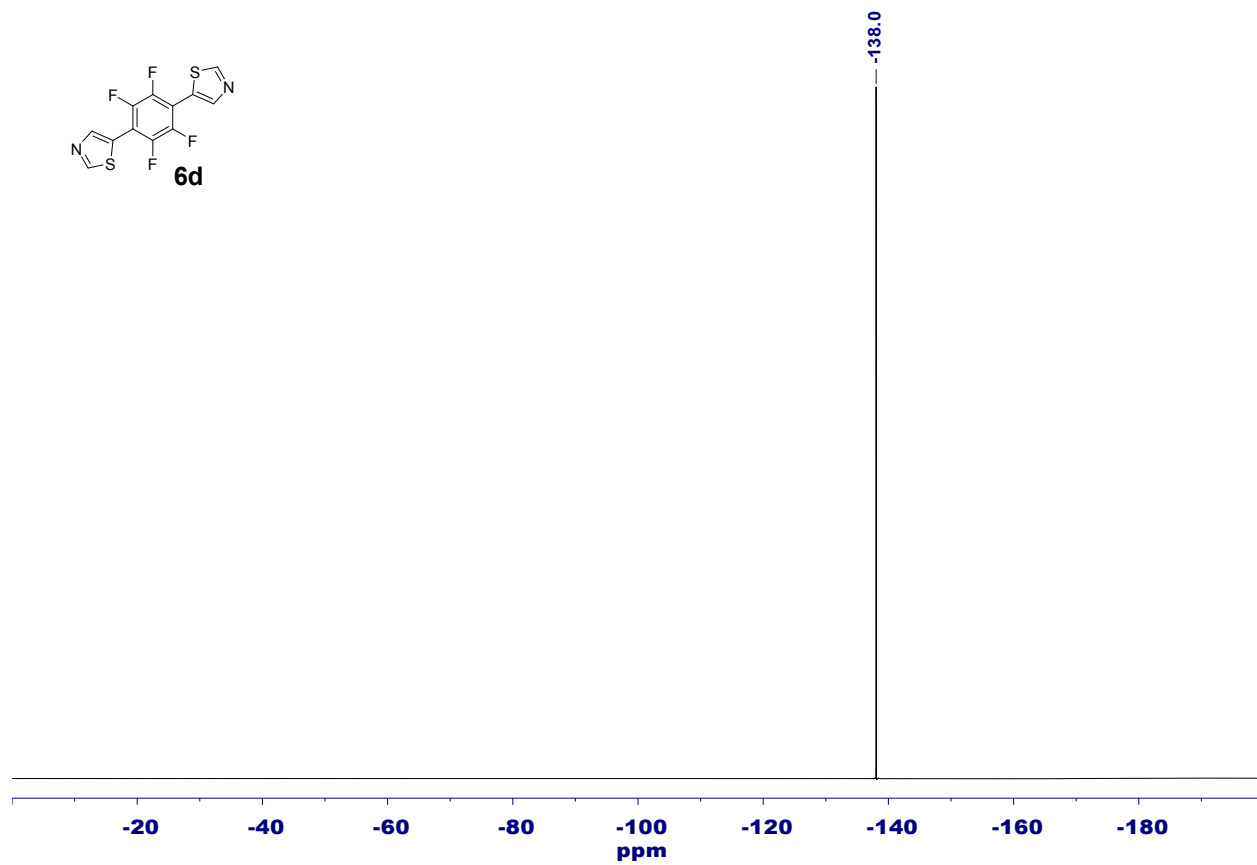

Table S1. Key crystallographic data

| Compound                               | 3b                                                           | 3c                                                           | 4a                                                            | 4b                 | 4c                                                                          | 5a                                                                            | 5b                                                                             | 5c                                                                                           | 5d                                                                                           | 6a                                                           | 6b                                                            | 6c                                                                          | 6d                                                                          |                    |
|----------------------------------------|--------------------------------------------------------------|--------------------------------------------------------------|---------------------------------------------------------------|--------------------|-----------------------------------------------------------------------------|-------------------------------------------------------------------------------|--------------------------------------------------------------------------------|----------------------------------------------------------------------------------------------|----------------------------------------------------------------------------------------------|--------------------------------------------------------------|---------------------------------------------------------------|-----------------------------------------------------------------------------|-----------------------------------------------------------------------------|--------------------|
| CCDC entry                             | 1856883                                                      | 1856884                                                      | 1856885                                                       | 1856886            | 1856887                                                                     | 1856895                                                                       | 1856896                                                                        | 1856897                                                                                      | 1856898                                                                                      | 1856899                                                      | 1856900                                                       | 1856901                                                                     | 1856902                                                                     |                    |
| Formula                                | C <sub>14</sub> H <sub>8</sub> F <sub>2</sub> S <sub>2</sub> | C <sub>14</sub> H <sub>6</sub> F <sub>4</sub> S <sub>2</sub> | C <sub>12</sub> H <sub>6</sub> FN <sub>2</sub> S <sub>2</sub> | N/A                | C <sub>12</sub> H <sub>4</sub> F <sub>4</sub> N <sub>2</sub> S <sub>2</sub> | C <sub>30</sub> H <sub>48</sub> N <sub>2</sub> S <sub>2</sub> Si <sub>2</sub> | C <sub>30</sub> H <sub>46</sub> FN <sub>2</sub> S <sub>2</sub> Si <sub>2</sub> | C <sub>30</sub> H <sub>46</sub> F <sub>2</sub> N <sub>2</sub> S <sub>2</sub> Si <sub>2</sub> | C <sub>30</sub> H <sub>44</sub> F <sub>4</sub> N <sub>2</sub> S <sub>2</sub> Si <sub>2</sub> | C <sub>12</sub> H <sub>8</sub> N <sub>2</sub> S <sub>2</sub> | C <sub>12</sub> H <sub>7</sub> FN <sub>2</sub> S <sub>2</sub> | C <sub>12</sub> H <sub>6</sub> F <sub>2</sub> N <sub>2</sub> S <sub>2</sub> | C <sub>12</sub> H <sub>4</sub> F <sub>4</sub> N <sub>2</sub> S <sub>2</sub> |                    |
| M, g mol <sup>-1</sup>                 | 278.32                                                       | 314.31                                                       | 261.31                                                        | 280.31             | 316.29                                                                      | 557                                                                           | 573.99                                                                         | 592.99                                                                                       | 628.97                                                                                       | 244.32                                                       | 262.30                                                        | 280.31                                                                      | 316.29                                                                      |                    |
| Size, μm <sup>3</sup>                  | 512×423×70                                                   | 244×53×21                                                    | 222×135×94                                                    | 150×90×20          | 512×437×150                                                                 | 695×288×76                                                                    | 386×220×105                                                                    | 337×50×47                                                                                    | 822×321×70                                                                                   | 113×73×35                                                    | 49×42×35                                                      | 184×128×15                                                                  | 900×755×66                                                                  |                    |
| Appearance                             | yellow plate                                                 | colorless needle                                             | yellow block                                                  | colorless plate    | colorless block                                                             | colorless block                                                               | colorless block                                                                | colorless block                                                                              | colorless block                                                                              | colorless plate                                              | yellow plate                                                  | colorless block                                                             | colorless plate                                                             | colorless plate    |
| Crystal system                         | monoclinic                                                   | monoclinic                                                   | monoclinic                                                    | monoclinic         | triclinic                                                                   | monoclinic                                                                    | monoclinic                                                                     | monoclinic                                                                                   | monoclinic                                                                                   | orthorhombic                                                 | orthorhombic                                                  | monoclinic                                                                  | monoclinic                                                                  | monoclinic         |
| Space group                            | P2 <sub>1</sub> /c                                           | P2 <sub>1</sub> /n                                           | P2 <sub>1</sub> /n                                            | P2 <sub>1</sub> /n | P-1                                                                         | P2 <sub>1</sub> /c                                                            | P2 <sub>1</sub> /c                                                             | P2 <sub>1</sub> /c                                                                           | P2 <sub>1</sub> /c                                                                           | Pna2 <sub>1</sub>                                            | Fdd2                                                          | P2 <sub>1</sub> /c                                                          | P2 <sub>1</sub> /n                                                          | P2 <sub>1</sub> /n |
| T, K                                   | 110                                                          | 100                                                          | 100                                                           | 100                | 110                                                                         | 100                                                                           | 100                                                                            | 100                                                                                          | 100                                                                                          | 100                                                          | 100                                                           | 100                                                                         | 110                                                                         | 110                |
| λ, Å                                   | 0.71073 (MoKα)                                               | 1.54178 (CuKα)                                               | 0.71073 (MoKα)                                                | 1.54178 (CuKα)     | 0.71073 (MoKα)                                                              | 1.54178 (CuKα)                                                                | 1.54178 (CuKα)                                                                 | 1.54178 (CuKα)                                                                               | 1.54178 (CuKα)                                                                               | 1.54178 (CuKα)                                               | 1.54178 (CuKα)                                                | 1.54178 (CuKα)                                                              | 1.54178 (CuKα)                                                              | 0.71073 (MoKα)     |
| α, Å                                   | 7.4893(9)                                                    | 6.2999(3)                                                    | 5.9315(6)                                                     | 5.7427(3)          | 5.0225(8)                                                                   | 9.2882(2)                                                                     | 9.3302(4)                                                                      | 9.3622(3)                                                                                    | 19.9633(7)                                                                                   | 15.9825(7)                                                   | 3.8093(3)                                                     | 6.6214(4)                                                                   | 3.8531(6)                                                                   |                    |
| b, Å                                   | 3.8493(4)                                                    | 5.0655(3)                                                    | 4.9497(5)                                                     | 5.5541(3)          | 7.1949(14)                                                                  | 12.3511(3)                                                                    | 12.3529(5)                                                                     | 12.3591(4)                                                                                   | 12.2859(4)                                                                                   | 9.7302(4)                                                    | 6.6644(4)                                                     | 25.6046(15)                                                                 | 23.868(3)                                                                   |                    |
| c, Å                                   | 19.835(2)                                                    | 18.6515(11)                                                  | 18.794(2)                                                     | 17.1753(8)         | 17.290(3)                                                                   | 14.5307(4)                                                                    | 14.5826(5)                                                                     | 14.6437(4)                                                                                   | 13.3676(5)                                                                                   | 13.6524(4)                                                   | 21.5126(15)                                                   | 7.2049(4)                                                                   | 6.1210(9)                                                                   |                    |
| α, °                                   | 90                                                           | 90                                                           | 90                                                            | 90                 | 84.549(3)                                                                   | 90                                                                            | 90                                                                             | 90                                                                                           | 90                                                                                           | 90                                                           | 90                                                            | 90                                                                          | 90                                                                          |                    |
| β, °                                   | 94.273(4)                                                    | 90.341(2)                                                    | 95.890(4)                                                     | 90.509(2)          | 83.096(2)                                                                   | 105.8260(10)                                                                  | 106.1850(10)                                                                   | 106.6740(10)                                                                                 | 90                                                                                           | 90                                                           | 94.338(4)                                                     | 116.456(4)                                                                  | 95.290(3)                                                                   |                    |
| γ, °                                   | 90                                                           | 90                                                           | 90                                                            | 90                 | 70.873(2)                                                                   | 90                                                                            | 90                                                                             | 90                                                                                           | 90                                                                                           | 90                                                           | 90                                                            | 90                                                                          | 90                                                                          |                    |
| V, Å <sup>3</sup>                      | 570.23(11)                                                   | 595.20(6)                                                    | 548.85(10)                                                    | 547.79(5)          | 584.98(18)                                                                  | 1603.77(7)                                                                    | 1614.11(11)                                                                    | 1623.15(9)                                                                                   | 3278.6(2)                                                                                    | 2123.12(14)                                                  | 544.57(7)                                                     | 1093.59(12)                                                                 | 560.53(14)                                                                  |                    |
| Z                                      | 2                                                            | 2                                                            | 2                                                             | 2                  | 2                                                                           | 2                                                                             | 2                                                                              | 2                                                                                            | 4                                                                                            | 8                                                            | 2                                                             | 4                                                                           | 2                                                                           |                    |
| ρ <sub>calc</sub> , g cm <sup>-3</sup> | 1.621                                                        | 1.754                                                        | 1.581                                                         | 1.699              | 1.796                                                                       | 1.153                                                                         | 1.181                                                                          | 1.213                                                                                        | 1.274                                                                                        | 1.529                                                        | 1.587                                                         | 1.703                                                                       | 1.874                                                                       |                    |
| μ, mm <sup>-1</sup>                    | 0.468                                                        | 4.434                                                        | 0.472                                                         | 4.514              | 0.496                                                                       | 2.364                                                                         | 2.41                                                                           | 2.458                                                                                        | 2.555                                                                                        | 4.284                                                        | 4.358                                                         | 4.523                                                                       | 0.517                                                                       |                    |
| θ <sub>min</sub> , °                   | 2.727                                                        | 4.742                                                        | 2.179                                                         | 5.150              | 1.188                                                                       | 4.777                                                                         | 4.773                                                                          | 4.768                                                                                        | 4.225                                                                                        | 6.234                                                        | 4.122                                                         | 3.452                                                                       | 3.414                                                                       |                    |
| θ <sub>max</sub> , °                   | 24.977                                                       | 70.09                                                        | 22.487                                                        | 78.795             | 27.48                                                                       | 70.133                                                                        | 70.091                                                                         | 70.187                                                                                       | 64.996                                                                                       | 65.259                                                       | 70.212                                                        | 62.519                                                                      | 27.499                                                                      |                    |
| Collected refl.                        | 976                                                          | 1110                                                         | 1289                                                          | 3760               | 6854                                                                        | 15613                                                                         | 18663                                                                          | 26658                                                                                        | 56562                                                                                        | 10935                                                        | 8852                                                          | 16240                                                                       | 7415                                                                        |                    |
| Independent                            | 976                                                          | 1110                                                         | 1289                                                          | 1047               | 2659                                                                        | 3032                                                                          | 3060                                                                           | 3087                                                                                         | 5565                                                                                         | 904                                                          | 1034                                                          | 1694                                                                        | 1261                                                                        |                    |
| Used                                   | 976                                                          | 1110                                                         | 1289                                                          | 964                | 2659                                                                        | 3032                                                                          | 3060                                                                           | 3087                                                                                         | 5565                                                                                         | 904                                                          | 1034                                                          | 1694                                                                        | 1261                                                                        |                    |
| R <sub>int</sub>                       | 0.079                                                        | 0.0724                                                       | 0.0586                                                        | 0.0375             | 0.0140                                                                      | 0.0410                                                                        | 0.0350                                                                         | 0.0409                                                                                       | 0.0490                                                                                       | 0.0289                                                       | 0.0605                                                        | 0.0675                                                                      | 0.0496                                                                      |                    |
| Parameters                             | 107                                                          | 91                                                           | 130                                                           | 82                 | 181                                                                         | 169                                                                           | 178                                                                            | 178                                                                                          | 373                                                                                          | 126                                                          | 86                                                            | 163                                                                         | 91                                                                          |                    |
| Restraints                             | 220                                                          | 0                                                            | 468                                                           | 0                  | 0                                                                           | 0                                                                             | 0                                                                              | 0                                                                                            | 1                                                                                            | 510                                                          | 1                                                             | 0                                                                           | 0                                                                           |                    |
| Largest peak, e Å <sup>-3</sup>        | 0.41                                                         | 0.325                                                        | 0.352                                                         | 0.362              | 0.393                                                                       | 0.358                                                                         | 0.339                                                                          | 0.307                                                                                        | 0.252                                                                                        | 0.166                                                        | 0.429                                                         | 0.455                                                                       | 0.294                                                                       |                    |
| Deepest hole, e Å <sup>-3</sup>        | -0.493                                                       | -0.332                                                       | -0.333                                                        | -0.302             | -0.211                                                                      | -0.333                                                                        | -0.218                                                                         | -0.236                                                                                       | -0.179                                                                                       | -0.156                                                       | -0.567                                                        | -0.313                                                                      | -0.254                                                                      |                    |
| Goof                                   | 1.342                                                        | 1.147                                                        | 1.174                                                         | 1.092              | 1.04                                                                        | 1.056                                                                         | 1.085                                                                          | 1.075                                                                                        | 1.068                                                                                        | 1.104                                                        | 1.314                                                         | 1.244                                                                       | 1.079                                                                       |                    |
| wR <sub>2</sub> (all data)             | 0.1703                                                       | 0.1070                                                       | 0.1590                                                        | 0.0850             | 0.0681                                                                      | 0.0915                                                                        | 0.0757                                                                         | 0.0738                                                                                       | 0.0563                                                                                       | 0.0621                                                       | 0.1609                                                        | 0.1468                                                                      | 0.0773                                                                      |                    |
| wR <sub>2</sub>                        | 0.1626                                                       | 0.1048                                                       | 0.1515                                                        | 0.0832             | 0.0660                                                                      | 0.0877                                                                        | 0.0737                                                                         | 0.0717                                                                                       | 0.0557                                                                                       | 0.0616                                                       | 0.1564                                                        | 0.1451                                                                      | 0.0761                                                                      |                    |
| R <sub>1</sub> (all data)              | 0.0902                                                       | 0.0472                                                       | 0.0928                                                        | 0.0350             | 0.0294                                                                      | 0.0422                                                                        | 0.0331                                                                         | 0.0311                                                                                       | 0.0235                                                                                       | 0.0265                                                       | 0.0979                                                        | 0.0631                                                                      | 0.0320                                                                      |                    |
| R <sub>1</sub>                         | 0.0787                                                       | 0.0429                                                       | 0.0818                                                        | 0.0315             | 0.0266                                                                      | 0.0363                                                                        | 0.0296                                                                         | 0.0282                                                                                       | 0.0222                                                                                       | 0.0256                                                       | 0.0864                                                        | 0.0591                                                                      | 0.0301                                                                      |                    |

3b major

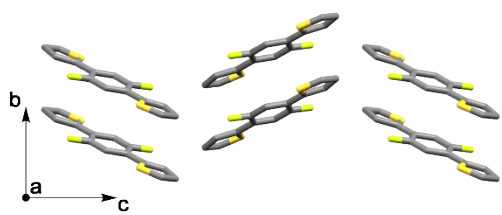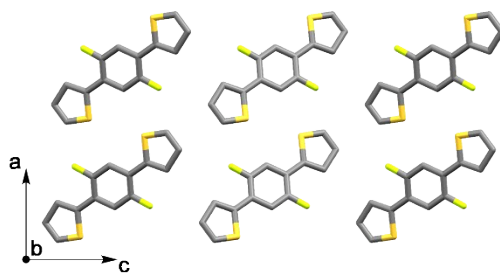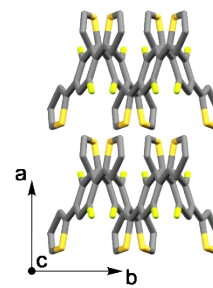

3b minor

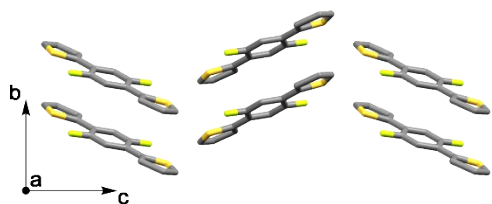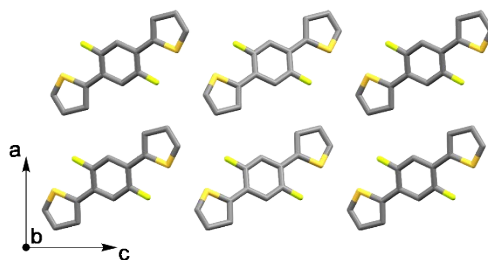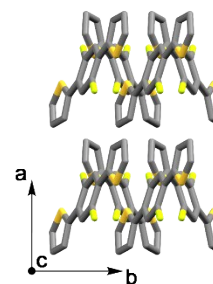

3c

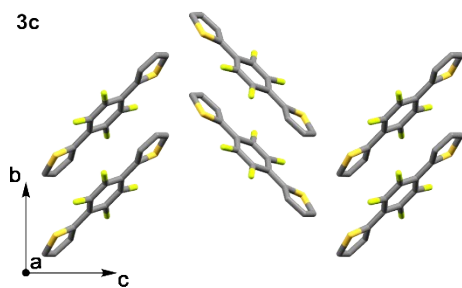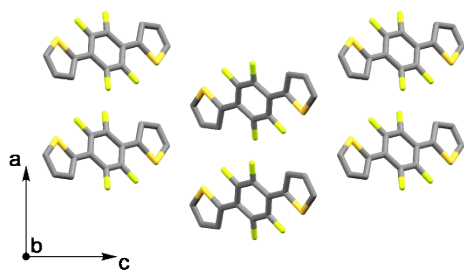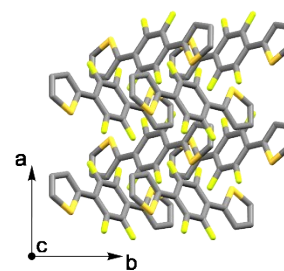

Figure S41. Crystal structures of 1,4-di(thien-2-yl)benzenes 3b,c.



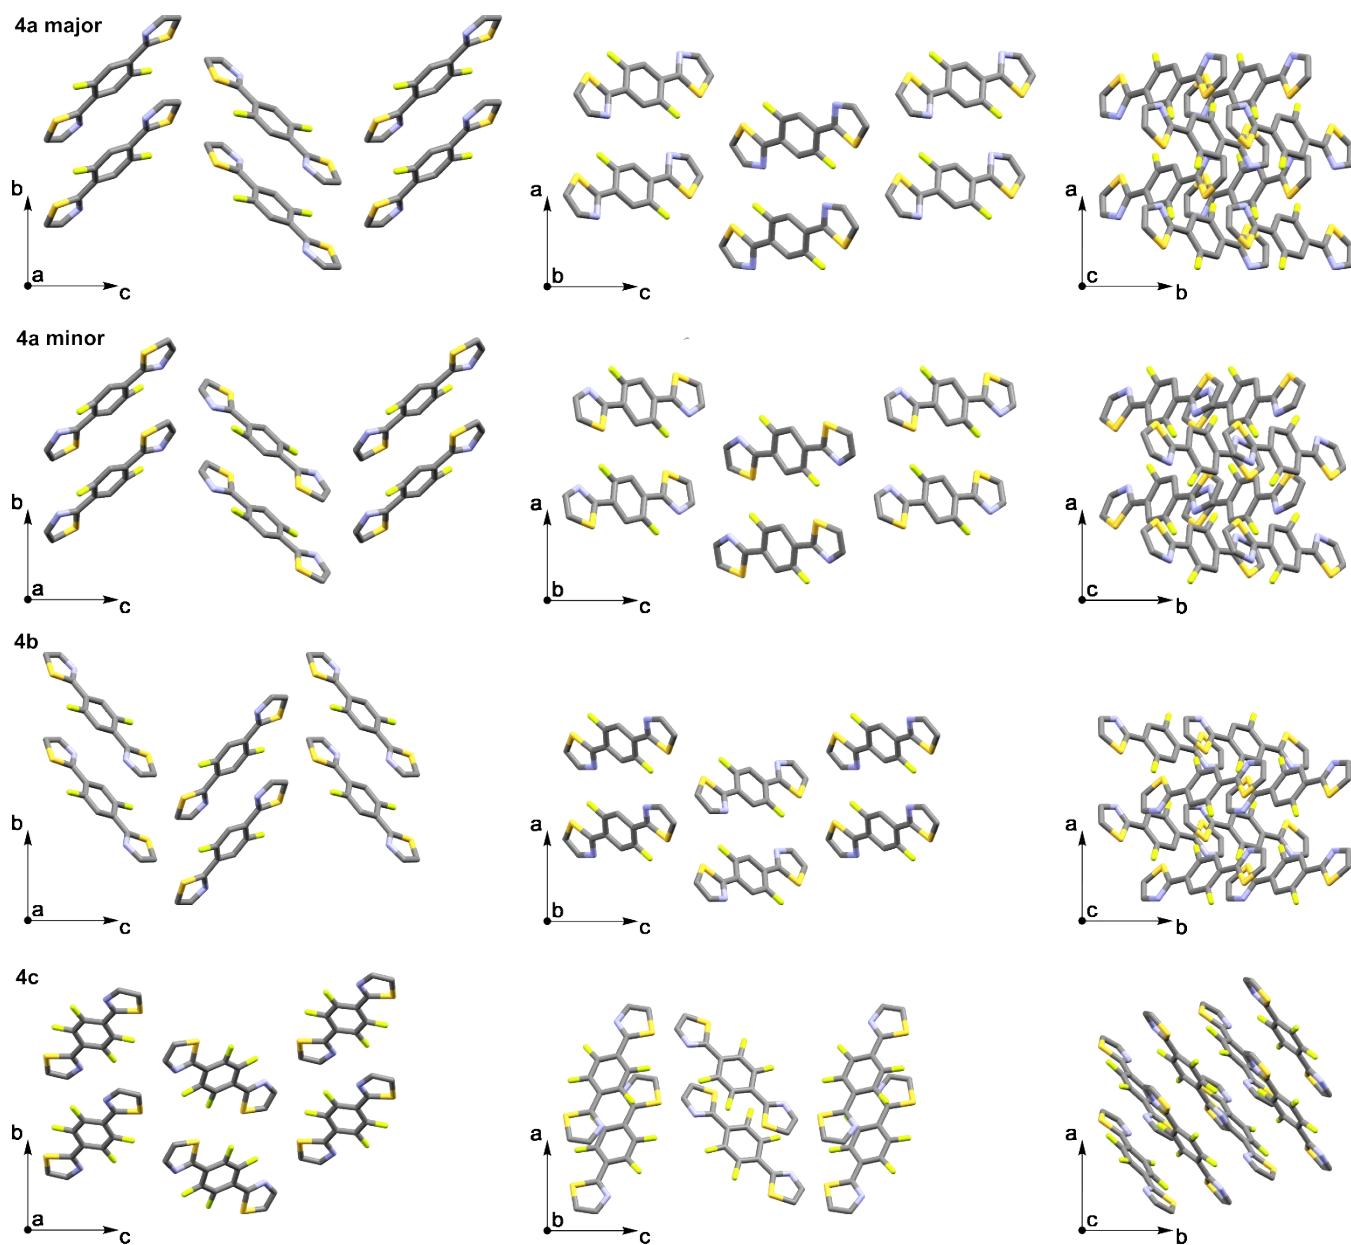

Figure S42. Crystal structures of 1,4-di(thiazol-2-yl)benzenes 4a-c.

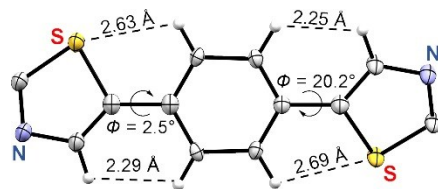

Figure S43. Molecular structure of di(thiazol-5-yl)benzene 6a. The thermal ellipsoids are scaled to the 50% probability level. Hydrogen atoms irrelevant to discussion are omitted for clarity.

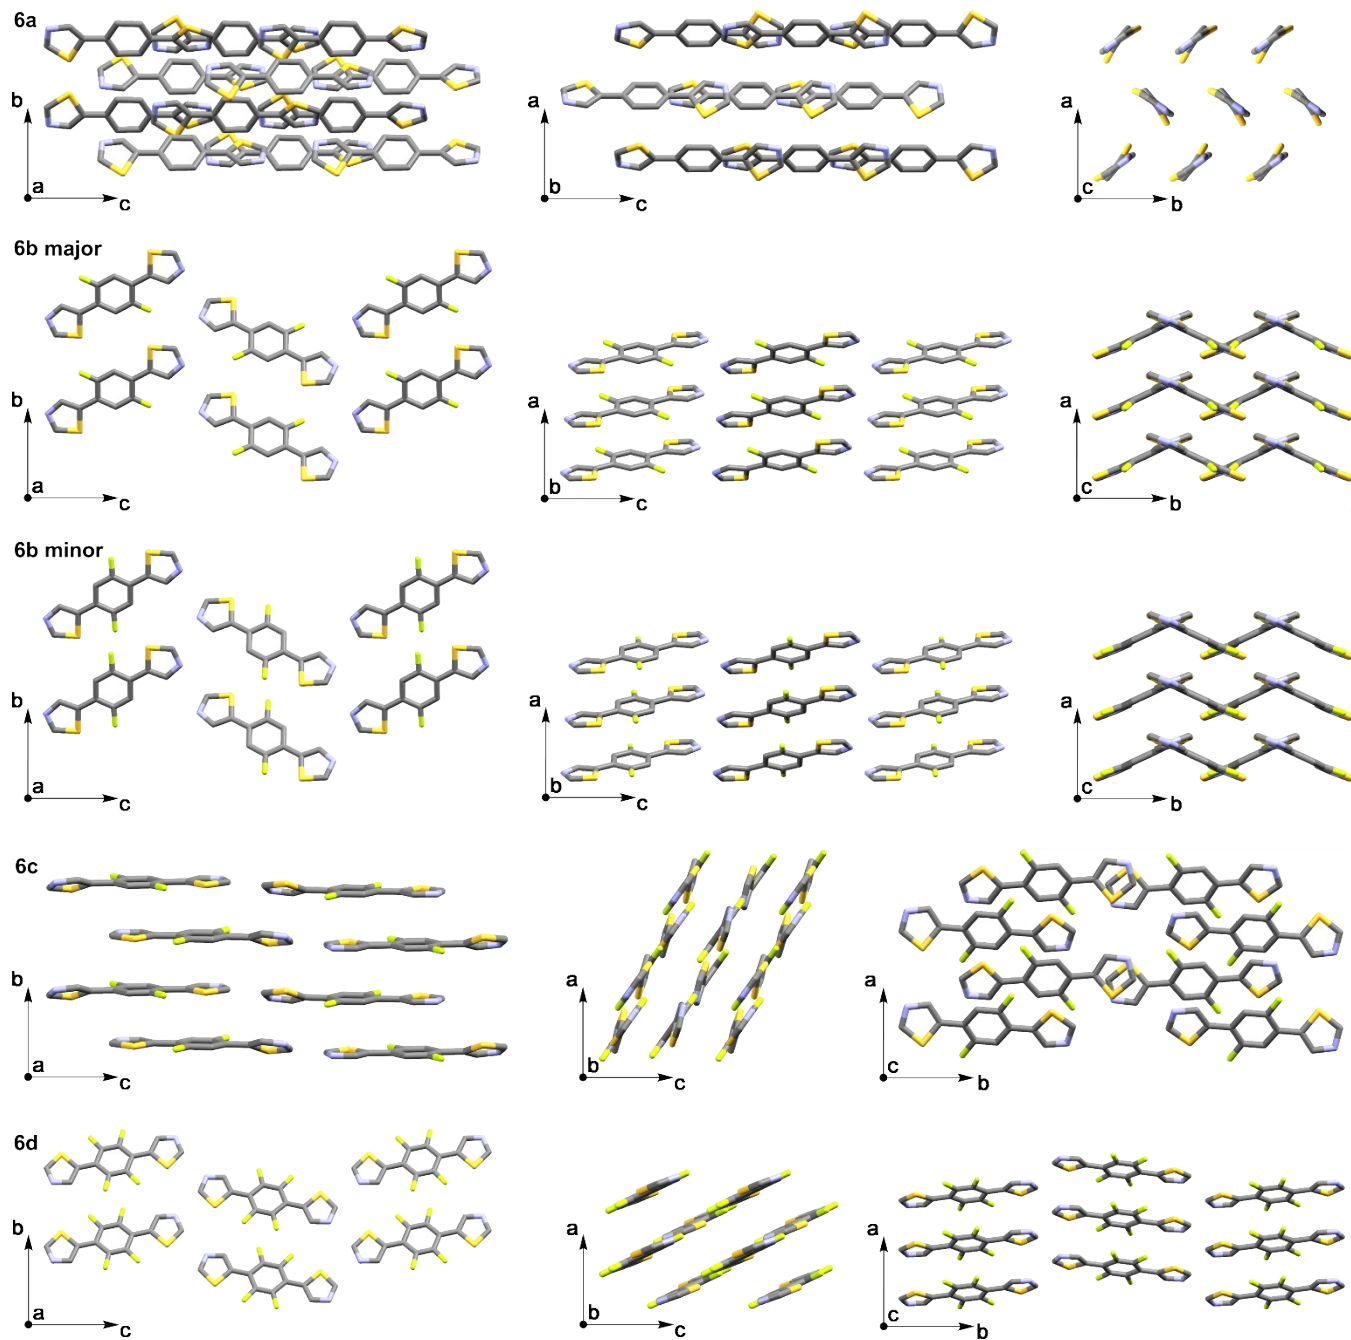

Figure S44. Crystal structures of 1,4-di(thiazol-5-yl)benzenes 6a-d.

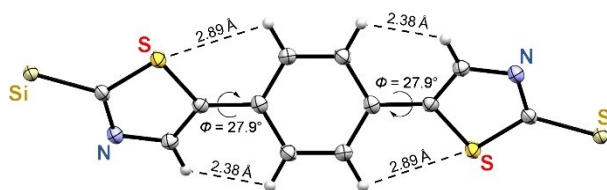

Figure S45. Molecular structure of 1,4-di(2-(triisopropylsilyl)thiazol-5-yl)benzene 5a.

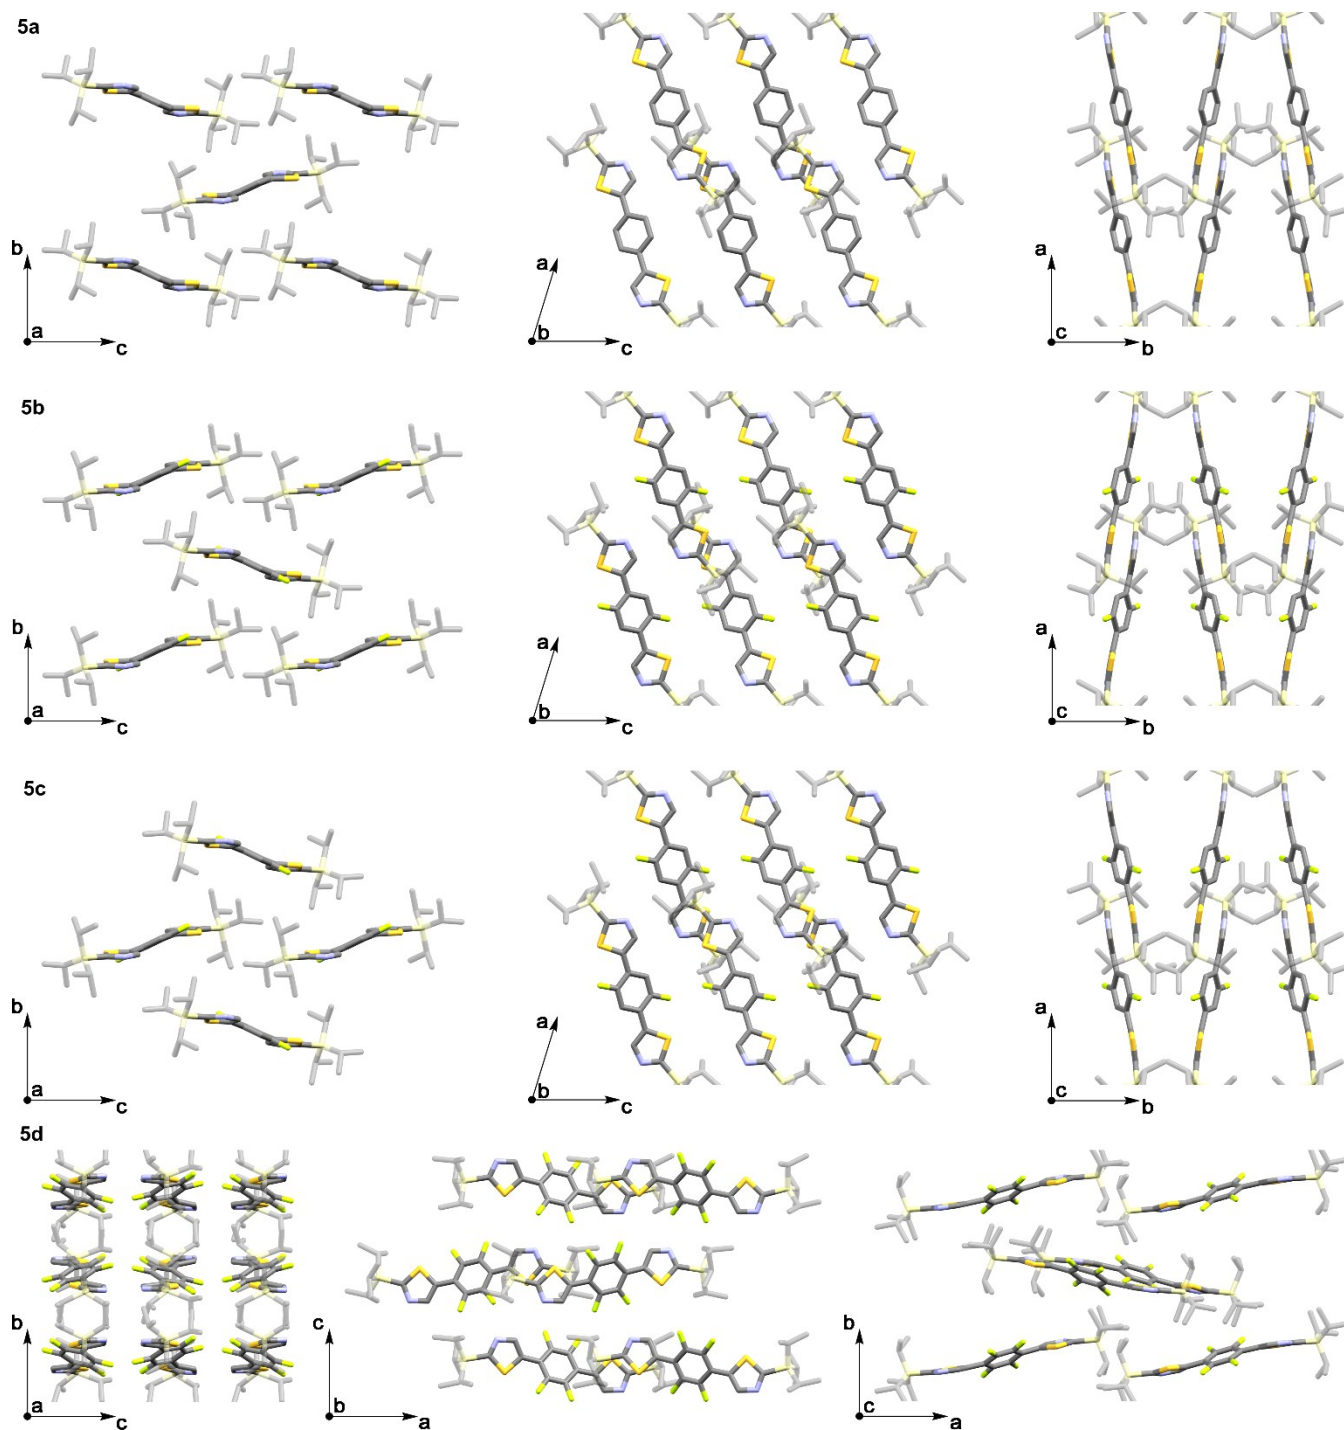

**Figure S46.** Crystal structures of 1,4-di(2-(triisopropylsilyl)thiazol-5-yl)benzenes **5a-d**. TIPS groups are dashed for clarity.

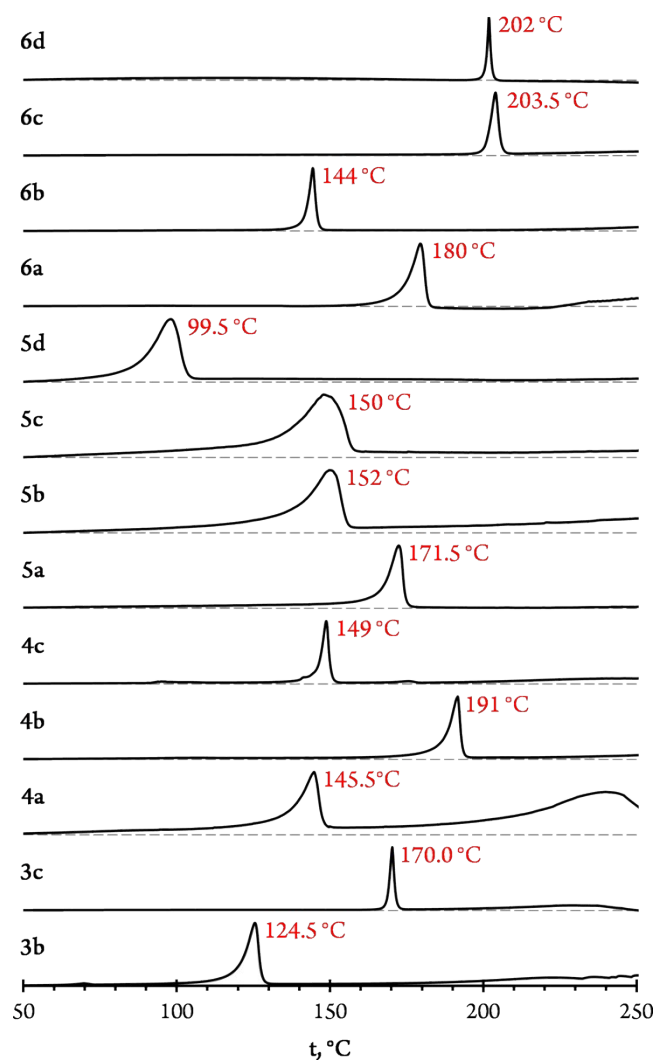

Figure S47. Normalized DSC curves for compounds 3b,c, 4a-c, 5a-d and 6a-d.
